# Supplementary material for: The extent to which genetics and lean grade affect fatty acid profiles and volatile compounds in organic pork
Source: PeerJ. 2019 Jul 17;7:e7322. doi: 10.7717/peerj.7322 (PMC6642625; doi:10.7717/peerj.7322)
Supplement: Supplemental Information 2 [file peerj-07-7322-s002.xlsx]

## Sheet: VC_end
Compound Method							C8d-C17-7	7-31-7-17	4-4371-c8d	1-4343-wb8d	4-4371-WB8D	4-4331-wb8d	2-419-17-wb8d	4-31-7-17-wb8d	1-4-9-17-wb8d	5-31-7-17-wb8d	3-4358-wb8d	5-4302-wb8d	2 negro-wb8d	4-4394-wb8d	B-17-7-wb8d	1-4388-wb8d	7-4364-wb8d	8-31-7-17-wb8d	2-4392-wb8d	9-31-7-17-wb8d	6-31-7-17-wb8d	3-4389-wb8d	A-17-7-wb8d	5-4330-wb8d	6-wb8d-B
							4372	4306	4371	4343	4371	4331	4356	4360	4340	4315	4358	4302	999	4394	4318	4388	4364	4354	4392	4387	4350	4389	FORA ESTUDI	4330	4373
							B	B	N	B	N	B	N	N	N	B	N	N	N	N	B	B	N	N	N	N	B	N	N	N	N
Name	REF AUTHORS	FAMILY	RT	CAS#	MZ	Units	Area	Area	Area	Area	Area	Area	Area	Area	Area	Area	Area	Area	Area	Area	Area	Area	Area	Area	Area	Area	Area	Area	Area	Area	Area
Methanethiol	Flores2018 (thomas2013)	Alcohol	2.14036	74-93-1	47	ng/ml	9210.91	3963.43	5684.48	7902.75	3489.25	3469.7	1536.49	2885.76	2295.75	5401.32	2845.83	4229.04	2555.71	22584.3	19512.7	12563.1	30854.9	16292.8	17085.4	28125	148227	172866	309089	24004.5	2607.29
Pentane	Gravador2014	Aliphatic (Hydrocarbon)	2.70977	109-66-0	43	ng/ml	42026.7	247160	104586	322838	246974	171154	321820	388114	341482	207683	573921	465811	748521	601892	933714	3.03003e+06	2.64424e+06	1.50977e+06	2.866e+06	1.52475e+06	1.60927e+06	1.82108e+06	3.93526e+06	2.76599e+06	154132
Propanal	Benet2014, Gorbatov1980	Aldehydes	3.14743	123-38-6	58	ng/ml	278834	471672	819473	802988	502080	806575	25866.7	468128	1.52661e+06	277819	173854	735881	278253	379664	1.43601e+06	586902	528436	1.19356e+06	199191	1.29333e+06	899559	740783	668803	427290	380703
Acetone	Gorbatov1980	Ketones	3.25072	67-64-1	58	ng/ml	162189	333675	141678	808626	199343	808143	202126	299299	1.53093e+06	178813	176368	737078	280402	383998	1.44548e+06	596040	538451	1.19779e+06	202446	1.30065e+06	904919	739761	667584	435350	138461
Carbon disulfide	Gravador2014	Sulfur-containing	3.49253	75-15-0	76	ng/ml	247369	115604	134369	87706.3	103270	119751	83142.5	107798	62465.3	85047.1	180744	122196	193159	193796	63175.4	49148.1	79534.7	74410	62711.2	90268.6	123745	61419.2	95787.3	93829.6	65020.8
n-Hexane	Gravador2014, Machiels2003	Aliphatic (Hydrocarbon)	4.78564	110-54-3	57	ng/ml	3.58599e+06	487290	323082	321881	278345	347695	553499	362819	316794	265100	532946	249331	398236	369751	427806	558968	609697	637300	510865	665768	512570	608273	673257	690057	240677
Acetic acid ethenyl ester	Perez_Santaescolástica2018	Ester	5.99308	108-05-4	86	ng/ml	13292.8		6363.14	8811.04	4306	84891.9	180690	206869	10509.5	1.06154e+06	697067	2.70459e+06	657410	570730	1.39283e+06	98563.3	166980	358609	96510.9	121942	745989	813577	355591	97156.4	19918.7
2-Butanone	Perez_Santaescolástica2018, Machiels2003, Gorbatov1980, Gravador2014	Ketones	6.24132	78-93-3	72	ng/ml	7690.81	11175.9	13934	15261.3	8536.29	17379.5	20890.8	23429.6	12624.7	23780.5	136047	37682.4	261075	45066.5	91511.3	54642.1	309786	75887.2	50758.2	202311	201662	215206	212542	120849	12728.3
Ethyl Acetate	Machiels2003	Ester	6.48339	141-78-6	43	ng/ml	14498.4	38361.5	10528.2	40909.4	5242.71	21838.2	31234.4	300911	38293.8	2.80865e+06	168545	7.95773e+06	455023	373023	781175	185145	95129.5	48191.4	51650.6	65136.7	139711	315762	197574	42022.4	3558.28
1-Propanol, 2-methyl-	Benet2014	Alcohol	8.70334	78-83-1	43	ng/ml	55582.6	10957.4	8017.4	44185.9	17699.5	347266	341912	1.40001e+06	212052	31572.9	79484.8	106508	360408	258900	29393.3	414272	307786	137885	1.13361e+06	56262.1	28082.4	24703.9	45467.5	623396	791.926
Butanal, 3-methyl-	Perez_Santaescolastica2018, Machiels2003	Aldehydes	9.243	590-86-3	58	ng/ml	17462.4	12654.6	9841.75	43177.9	12295.4	345115	347407	1.5608e+06	197217	30873.5	47260.1	117187	12254.3	19486.5	35690.6	58504.4	8700.15	7568.93	4100.57	18018.7	4975.3	8269.62	115314	86685.3	6980.39
Butanal, 2-methyl-	Machiels2003, Gravador2014	Aldehydes	9.81321	96-17-3	58	ng/ml	23356.7	12654.6	9841.75	21908.1	12295.4	155584	320775	678190	113424	15950.8	39035.4	6319.52	16361.5	4273.09	21140.1	60193.6	49589.7	1541.05	55533.3	33331	54125.5	92209.3	133371	104470	8024.74
Heptane	Lorenzo2014, Ruben Dominguez2014, Gravador2014	Aliphatic (Hydrocarbon)	9.98956	142-82-5	100	ng/ml	10178.8	39547.6	25482.2	30045	25586.5	44127.1	82435.3	85488.9	65806.9	51133.2	132567	108731	226775	230172	332813	719632	645045	218000	825567	430685	703986	1.19749e+06	1.76735e+06	1.35341e+06	51526.5
Acetic acid	Perez_Santaescolastica2018, Machiels2003,Kosowska2017, Jian_Zhao2017	Carboxilic acid	10.9057	64-19-7	60	ng/ml	32200.4	11626.5	23978.5	289.749	17645.1	19857	150807	17125.8	4146.67	38205.6	33930.8	128319	23965.2	9146.64	8830.51	165255	12920.5	16174.9	24207.1	16261.3	44187.3	15256.7	7044.99	163188	3895
Furan, 2-ethyl-	Lorenzo2014, Ruben Dominguez2014, Gravador2014	Furan	11.3029	3208-16-0	81	ng/ml	3649.14	7164.9	15328.4	17931.3	88477.9	38726.6	105928	71675.4	36685.5	44396.8	87154.3	80358.9	87362.9	105797	91593.7	232559	89832.4	130938	159760	129841	117978	80443.9	52142.7	209552	102333
1-Butanol	Benet2014, Jian_Zhao2017	Alcohol	11.4327	71-36-3	56	ng/ml	16597.1	29565.3	20162.1	18711.7	25160.2	36651.3	111658	54521	62936.6	61528.8	109371	62011.3	77392.3	26585.9	28280.3	31310.8	16558.5	27019.6	34477.8	101913	61993.5	42216	48963.1	22212.6	75960.4
2-Pentanone	Perez_Santaescolastica2018, Lorenzo2014, Ruben_Dominguez2014, Machiels2003	Ketones	12.0512	107-87-9	86	ng/ml	69918.2	4978.77	4752.16	99474.8	5372.18	4327.35	8789.16	8389.77	9512.69	5574.58	7624.3	15584.2	12645.2	34904.5	92579.9	21670.4	44715.1	26226	25725.2	120336	142698	123715	121130	21835.8	7405.1
Pentanal	Lorenzo2014 (Sciene Meat), Benet2014, Gorbatov1980, Gravador2014, Meynier1998, Jian_Zhao2017	Aldehydes	12.4	110-62-3	58	ng/ml	1.80789e+06	1.48021e+06	2.2278e+06	2.42136e+06	2.23853e+06	1.74783e+06	162191	1.29297e+06	1.69095e+06	1.35303e+06	42774.1	24789.7	25641.4	22559.9	18280.7	23226	24891.7	41247.7	23975.1	69738	28851.6	20686.5	34459.6	31950.1	545599
2,3-Pentanedione	Machiels2003, Gorbatov1980	Ketones	12.7544	600-14-6	100	ng/ml	57862.5	61944.3	76212.1	73088.7	69844	65716.8	47056	71031.6	59679.4	28302.4	14876.8	25622.3	12098.4	10508.3	11469.3	2494.55	3511.83	6947.4	2612.2	3227.61	7323.03	7392.95	3879.84	2178.18	44405.5
Acetoin	Gorbatov1980	Carboxilic acid	15.1334	513-86-0	45	ng/ml	5663.97	23385.9	5801.98	30514	3924.43	661171	1.98898e+06	2.13726e+06	40812.1	7.64959e+06	1.24233e+07	6.27655e+07	1.64244e+07	1.88045e+07	4.2574e+07	2.54963e+06	5.13083e+06	1.14443e+07	3.22133e+06	3.32877e+06	2.69645e+07	2.92075e+07	1.26368e+07	2.12814e+06	19514.1
3-Buten-1-ol, 3-methyl-	Jian_Zhao2017	Alcohol	15.8186	763-32-6	56	ng/ml	29415.7	3460.27	4896.52	4783.75	5046.58	4726.86	46454.7	7528	5670.39	7222.06	37284.8	9876.48	39698	559847	19309.6	820484	368604	551292	178161	443359	158075	124643	242594	601656	6052.78
Toluene	Lorenzo2014, Ruben Dominguez2014, Gravador2014, Meynier1998	Aromatic and Cyclic (Hydrocarbons)	15.9151	108-88-3	91	ng/ml	50589.3	28535.2	118852	66853.7	60552	64240.4	127159	141165	45302.6	134671	40647.2	117408	52384	105882	91285.4	210887	47526.2	44743.1	145600	52269.8	102457	180277	132961	83462.2	66018.4
1-Butanol, 3-methyl-	Perez_Santaescolastica2018	Alcohol	16.0801	123-51-3	55	ng/ml	2773.88	3168.41	5829	5836.76	6889.65	39280.6	496788	216899	20105.9	7718.78	1.84736e+06	218476	2.60975e+06	5.40874e+06	3.12551e+06	7.34309e+06	3.35795e+06	4.94946e+06	1.6904e+06	4.43059e+06	1.49994e+06	1.17268e+06	2.23413e+06	5.42297e+06	5726.27
1-Octene	Machiels2003	Aliphatic (Hydrocarbon)	16.43	111-66-0	70	ng/ml	4367.37	9558.82	74444.5	80286.5	14192.4	8397.34	96305	147953	7687.01	20865.6	172007	178221	257245	231140	124744	1.02335e+06	323140	320421	463802	315201	714396	1.29136e+06	1.6819e+06	819139	121475
Cyclopropane, pentyl-	Lorenzo2014	Aromatic and Cyclic (Hydrocarbons)	16.4358	2511-91-3	56	ng/ml	28669.5	65694.1	78994.2	5051.06	4080.54	4471.23	55364.3	168550	5697.33	7254.91	18469.9	12338	453433	444179	106433	79045.8	674288	634843	644006	185174	44601.3	1.41579e+06	1.83683e+06	1.26968e+06	119900
3-Hydroxy-3-methyl-2-butanone	Perez_Santaescolastica2018, Gravador2014	ketones	16.5068	115-22-0	59	ng/ml	551.601	155.68	336.92	1075.27	835.669	789.268	3154.76	1905	161.874	1219.32	5280.68	6358.03	12818	14486.6	89848.2	41797.4	8522.67	9468.82	21082.8	10955.5	144769	30668.9	22541.4	42683.6	1661.61
Octane	Perez_Santaescolastica2018, Lorenzo2014	Aliphatic (Hydrocarbon)	16.7499	111-65-9	85	ng/ml	69711.7	178220	240914	272880	223322	285324	342619	501798	356736	394090	516450	623383	941972	1.0603e+06	1.23784e+06	3.61444e+06	2.2344e+06	776673	3.38061e+06	1.47187e+06	2.64161e+06	4.81136e+06	6.30307e+06	5.64654e+06	415221
1-Pentanol	Lorenzo2014, Gravador2014, Meynier1998, Jian_Zhao2017	Alcohol	17.8728	71-41-0	55	ng/ml	966257	1.75527e+06	1.29535e+06	1.13191e+06	2.03489e+06	1.85284e+06	4.28949e+06	2.80306e+06	2.93401e+06	3.44191e+06	4.91583e+06	3.20461e+06	4.94799e+06	4.37003e+06	2.75337e+06	3.31693e+06	3.15054e+06	3.2972e+06	3.67966e+06	4.96995e+06	3.5024e+06	3.46312e+06	3.52459e+06	2.87051e+06	3.94653e+06
Hexanal	Perez_Santaescolastica2018, Lorenzo2014, Ruben_Dominguez2014, Machiels2003, Benet2014, Gorbatov1980, Gravador2014, Jian_Zhao2017	Aldehydes	18.7597	66-25-1	56	ng/ml	2.72764e+07	2.31151e+07	2.9081e+07	3.10143e+07	3.19744e+07	2.52088e+07	9.65311e+06	2.3544e+07	2.41334e+07	2.56754e+07	579964	1.70389e+06	489115	378163	111305	210884	166695	322431	299315	163660	216946	199396	67350.9	175114	2.44742e+07
2,3-Butanediol	Jian_Zhao2017	Alcohol	20.7288	513-85-9	45	ng/ml			1615.33				3990.05	157305	169971	3814.68	19097.9	272212	3856.57	10422.6	1.21505e+06	23846.7	208832	82740.2	4342.17	605516	1.23165e+06	1.26468e+06	611345	174048
2,3-Butanediol, [S-(R*,R*)]-	Jian_Zhao2017	Alcohol	21.1199	19132-06-0	45	ng/ml		53821.7	68451.5		74694.4		14157.2	53177.4		6640.63	75182.1	272212	37971	27512.2	63630.6	469573	300344	139605	68336.2	187933	387770	350334	247193	677062
Butanoic acid	Jian_Zhao2017	Carboxilic acid	21.2066	107-92-6	60	ng/ml	29414.8	28297.6	44740.9	4160.15	27600.7	26945.9	46194.1	16020.5	5992.46	24706.7	22148.3	5984.71	13657.9	2863.93	3607.2	25380.6	9653.62	10572.8	20669.8	4187.03	33728.1	17212.1	263704	31534.3	4901.49
Benzene, 1,3-dimethyl-	Gravador2014; Jian_Zhao2017	Aromatic and Cyclic (Hydrocarbons)	21.5184	108-38-3	91	ng/ml	17580.5	21626.3	79805.9	19455.6	22273.2	30876.2	75440.6	91651	63708.3	94872.8	21221	19771.6	16551	28223.6	32482	229403	23572.3	27449.6	121436	29131.9	22250	13633.9	19392.9	37012.3	44338.4
1-Octen-3-one	Benet2014	Ketones	21.5474	4312-99-6	70	ng/ml	7406.99	11387.8	16600.4	3139.39	19077.8	15650.2	14040.9	19648.5	8268.02	23022.5	19753.3	18179.2	10248.1	17657.4	92575.2	26881.1	25112.2	16261.3	22617.9	21319.7	30552.3	32240.5	17513.8	35949.8	42632.1
Nonane	Lorenzo2014, Jian_Zhao2017	Aliphatic (Hydrocarbon)	21.9676	111-84-2	57	ng/ml	5498.19	8854.21	10107.3	10562.2	14769.6	304735	2.15618e+06	20375.4	10272.8	583908	2.74215e+06	1.59549e+06	2.93884e+06	2.96507e+06	775087	2.45628e+06	2.16888e+06	1.29669e+06	2.90458e+06	1.5758e+06	1.75821e+06	1.44616e+06	1.76166e+06	2.26709e+06	1.33698e+06
2-n-Butyl furan	Lorenzo2014, Ruben Dominguez2017	Furan	22.3398	4466-24-4	81	ng/ml	10555.3	7210.94	26544	30928	31860.7	29833.8	27637.4	46855.3	25720.1	37691	29269.2	28797.9	31335.3	54625.2	41576.5	131112	37511.7	36024.9	70046.5	40130	37718.5	44671.9	31676.4	81102.6	68577.2
1-Hexanol	Perez_Santaescolastica2018, Lorenzo2014, Benet2014, Jian_Zhao2017	Alcohol	22.8366	111-27-3	56	ng/ml	145234	145163	382077	247523	272608	3.83404e+06	2.52922e+07	2.52619e+06	514330	7.58424e+06	3.17888e+07	1.89391e+07	3.41001e+07	3.46682e+07	9.74107e+06	2.83746e+07	2.55716e+07	1.53998e+07	3.44394e+07	1.90296e+07	2.09993e+07	1.72113e+07	2.12109e+07	2.68796e+07	1.58154e+07
2-Heptanone	Perez_Santaescolastica2018; Lorenzo2014, Ruben Dominguez2014. Machiels2003, Benet2014, Meynier1998, Jian_Zhao2017	Ketones	23.3919	110-43-0	58	ng/ml	62070.6	55052.8	159332	164319	198434	170191	271998	344899	191017	300728	310604	330904	363054	691886	534189	804530	498337	424605	608760	548457	700677	595362	452167	718961	472322
Butanoic acid, 3-methyl-	Machiels2003	Carboxilic acid	23.4872	503-74-2	60	ng/ml	1904.03	2276.27	1480.14	1039.3	1527.29	1810.95	3354.21	2745.98	1217.9	6830.49	13213.2	131653	6678.22	3770.78	167471	19665	34433.6	22512.9	6955.28	51817.5	192336	576508	216646	25021.3	3792.08
Heptanal	Perez_Santaescolastica2018, Lorenzo2014, Rube_ Dominguez2014, Machiels2003, Gorbatov1980, gravador2014, Meynier1998, Jian_Zhao2017	Aldehydes	23.7076	111-71-7	70	ng/ml	534583	422025	770048	772363	777481	632584	523423	891568	911096	861411	1.20454e+06	73225.1	1.28986e+06	1.30738e+06	29061.6	1.07917e+06	49004.6	154458	1.29461e+06	36688.1	46772.9	57371.5	42284.6	61060.7	807666
2-Heptenal, (Z)-	Benet2014, Meynier1998, Jian_Zhao2017	Aldehydes	26.6413	57266-86-1	83	ng/ml	22006	25896.6	45877.2	34950.4	44548.5	42460.2	61675.9	64709.4	60357.2	61338.5	47297	35947.7	49289.1	62761.2	32397.7	102801	44990.4	52255	61080	32797.1	30162.9	58466.5	33132.9	77341.3	63521.4
Furan, 2-pentyl-	Lorenzo2014, Ruben Dominguez2014, Benet2014, Gravador2014, Meynier1998, Jian_Zhao2017	Furan	26.648	3777-69-3	81	ng/ml	167173	122127	455847	437195	614057	458377	647314	881158	493035	773666	753809	744856	811659	1.61269e+06	914314	2.66862e+06	1.21872e+06	1.00283e+06	1.55459e+06	863718	804381	1.25058e+06	951511	2.13111e+06	1.05401e+06
Benzaldehyde	Lorenzo2014, Ruben Dominguez2014, Gorbatov1980, Gravador014, Jian_Zhao2017	Aldehydes	26.9826	100-52-7	106	ng/ml	82672.8	91483.4	153938	150738	149137	146189	83645.7	258473	120108	213537	24423.3	191068	21356	22067.4	46407.2	24939	17275.2	19560.2	21038.4	24189	36129.5	57399.4	20897.9	23986	106408
1-Heptanol	Machiels2003, Benet2014, Jian_Zhao2017	Alcohol	27.0014	111-70-6	56	ng/ml	120265	79197.5	167391	136661	152292	1.91124e+06	231726	163228	134634	202354	408830	309844	535608	591702	312552	515700	453184	237487	661361	449340	432602	561103	521074	577420	293549
2-Butenal, (Z)-	Machiels2003	Aldehydes	27.0135	15798-64-8	70	ng/ml	39756.5	48554.9	81073	46552.3	87101.2	64439.7	308419	200931	172586	226928	544893	446284	726360	801886	406425	670056	618010	318774	894857	660142	634182	732498	680310	778718	358901
1-Octen-3-ol	Perez_Santaescolastica2018, Lorenzo2014, Machiels2003, Benet2014, Gravador2014, Meynier1998, Jian_Zhao2017	Alcohol	27.2548	3391-86-4	57	ng/ml	1.71392e+06	1.09866e+06	3.28341e+06	2.52628e+06	3.01211e+06	2.71821e+06	3.51983e+06	3.76153e+06	2.77585e+06	3.75949e+06	2.7868e+06	4.15616e+06	3.48718e+06	6.81279e+06	4.51456e+06	7.50664e+06	4.192e+06	4.43821e+06	5.26727e+06	5.27258e+06	4.25319e+06	5.60626e+06	4.55776e+06	6.16602e+06	3.79334e+06
2-Octanone	Machiels2003, Benet2014	Ketones	27.6123	111-13-7	58	ng/ml	25881.6	13359	25966	14877.6	17735.1	12258	17535.4	12831	10940.1	14713.9	14301.4	20209.2	19456.3	30010.7	28368.9	104721	29461.7	42451.4	58320	23720.4	14334.4	20451.3	33901.9	55650.9	15290.2
Acetic acid, butyl ester	Jian_Zhao2017	Ester	27.8755	123-86-4	56	ng/ml	166077	142979	224242	221697	216287	165386	241401	363575	32873	249827	120410	28036.6	69546.7	107201	22411.4	66300.4	42089.3	334894	39721.2	29612.8	33026.4	49376.6	29915.9	61191.6	339436
Octanal	Lorenzo2014, Ruben Dominguez2014, Machiels2013, Benet2014, Gorbatov2014, Gravador2014, Meynier1998	Aldehydes	27.9498	124-13-0	84	ng/ml	188060	128937	251494	212472	238537	190343	237795	367753	265256	276644	129857	65502.5	35100.3	91204.6	3036.75	50582.4	24383.6	231310	37225.1	7176.75	13079.1	21450.5	26065.8	70972.6	393690
Hexane, 2,4,4-trimethyl-	Jian_Zhao2017	Aliphatic (Hydrocarbon)	28.0629	16747-30-1	71	ng/ml	1.85941e+06	1.04678e+06	2.44856e+06	2.2884e+06	2.71657e+06	1.69547e+06	1.62993e+06	97008.1	1.14064e+06	102736	73041.6	79884.5	57383.9	79493.5	54315.7	147067	94243.5	54138	92606.1	59828	86326.6	131722	114124	109994	238691
Pentanoic acid	Machiels2003, Jian_Zhao2017	Carboxilic acid	28.7542	109-52-4	60	ng/ml	196521	216999	137163	30756.6	71603.4	79109.8	216246	154712	53874.9	70076.7	69439.2	30864.1	54361.6	31273	14975.8	152542	25805.4	59603.9	89145.7	11452.3	30930.7	12419.4	3388.24	243449	38377.2
Heptane, 3,3,4-trimethyl-	Lorenzo2014	Aliphatic (Hydrocarbon)	28.9814	20278-87-9	71	ng/ml	36812.4	16600.2	37114	20387.4	29872.2	21575.6	24911.8	31271.7	16947	34110.6	27006	29861	22725.4	28668	16963.5	63347.8	31443.8	22761.3	36733.3	22595.9	28487.2	46411.8	45345.3	44881.5	86732.9
2-Ethyl-1-hexanol	RubenDominguez2014, Machiels2003, Benet2014	Alcohol	29.2416	1000411-44-8	57	ng/ml	57092	16066.5	55535.7	39373.8	40169.9	46277	20824.8	30273.8	25255.9	41149.8	25747.7	23914.9	19464.5	25505.8	19214.7	55883.3	31440.6	21010.6	36778.6	44352.3	26212.1	74325.4	34325.4	32522.7	78765.9
Undecane	Perez_Santaescolastica2018, lorenzo2014	Aliphatic (Hydrocarbon)	30.1191	1120-21-4	57	ng/ml	912933	275736	784883	574669	510527	412905	445572	608247	398739	633059	446688	511009	399689	547367	351607	1.14701e+06	595316	433930	677131	378938	475339	893243	39858.1	612068	1.13041e+06
2-Octenal, (E)-	Benet2014, Meynier1998, Jian_Zhao2017	Aldehydes	30.5737	2548-87-0	83	ng/ml	10271.6	14029.3	19569.3	13637.8	14389.7	16135.4	33527	22550.9	26114.7	17521.3	14645.5	7012.26	14934.8	206645	90706.5	14061.5	171695	13380.6	16999.1	97328.8	95610.1	184834	165495	12518.8	14454.2
1-Octanol	Benet2014, Jian_Zhao2017	Alcohol	30.7382	111-87-5	56	ng/ml	28359.4	22665.2	74633.7	37588.4	74441.4	57386.5	111810	138763	116183	158140	166452	163963	238601	390079	190568	344322	326570	136503	447210	203791	200475	362004	309614	399589	192844
Heptane, 4-methylene-	Perez_Santaescolastica2018	Aliphatic (Hydrocarbon)	30.7384	15918-08-8	55	ng/ml	16615.9	18849.5	38831.9	23225.9	43548.6	33388.3	75859.4	133856	71136.2	84846.2	170510	172147	233315	253602	184014	289910	318001	107035	397571	201767	184716	347350	303154	401540	189237
Pentanoic acid, 2-methyl-, anhydride	Gravador2014	Carboxilic acid	31.1933	63169-61-9	99	ng/ml	18993.5	17209.7	115989	45972.4	81490.3	97774.4	278732	227986	255451	205698	59528.2	98705.5	122455	127653	221885	214483	88409.8	138759	264264	128541	275471	165884	48534.6	133792	118990
Nonanal	Lorenzo2014, Ruben_Dominguez2014, Machiels2003, Benet2014, Gorbatov1980, Gravador2014, Meynier1998, Jian_Zhao2017	Aldehydes	31.7105	124-19-6	98	ng/ml	220420	147938	230827	245325	243514	216510	272213	335594	304213	300879	202351	76484.4	184520	60770.1	7202.59	58377.6	62028.4	67827.8	141431	12080	11796	13585.2	6738.45	30758.3	362905
Phenylethyl Alcohol	Jian_Zhao2017	Alcohol	33.3067	60-12-8	91	ng/ml	1076.24	1719.31	1644.41	372.365	183.368	1429.28	6806.09	10627.6	340.953	207.629	39116	9159.01	42541.4	50717.7	207802	222692	93645.1	122980	15126.2	296755	101075	66485.7	173662	208702	2413.87
Dodecane	Perez_Santaescolastica2018, Lorenzo2014, Ruben Dominguez2014, Jian Zhao2017	Aliphatic (Hydrocarbon)	33.5717	112-40-3	57	ng/ml	626665	195109	502579	311739	248024	216309	248694	356536	241346	411371	317358	327649	272511	361260	243727	680728	408415	387684	382995	213821	238053	553474	28491.3	395835	652743
1-Nonanol	Benet2014	Alcohol	34.1565	143-08-8	56	ng/ml	118192	2192.53	88281.5	4390.76	2477.28	2642.37	7375.44	4947.27	5293.55	5914.99	24848.4	8122.11	37174.3	93689.7	13897.2	184406	113137	14684.4	224266	18442.2	18226	38370.5	44766.4	236395	6153.45
1-Nonene	Machiels2003	Aliphatic (Hydrocarbon)	34.1667	124-11-8	83	ng/ml	3708.06	3766.61	4422.69	3398.82	5341.62	5657.13	9982.44	10488.5	10454.2	8112.64	16675.2	8332.26	20552.8	50735.1	7621.27	92310.5	56167.7	10861.7	108152	10905.1	8837.59	17345.8	18227.2	113982	12635.9
Octanoic acid	Lorenzo2014, Benet2014, Jian_Zhao2017	Carboxilic acid	35.1836	124-07-2	60	ng/ml	22385.9	28517.9	10840.6	643.914	3680.59	19708.2	4819.68	13361.4	4191.81	3041.22	3259.92	112.911	4254.88	1435.54		3693.55	145.289	1202.26	1618.88		266.64	538.194	247.394	3782.39	3753.51
Tridecane	Perez_Santaescolastica2018, lorenzo2014, Ruben Dominguez2014, meynier1998, jian_Zhao2017	Aliphatic (Hydrocarbon)	36.7544	629-50-5	57	ng/ml	219388	138379	163560	79252.9	73333.6	65793.6	69119.5	126758	98102.8	154627	149584	130459	112010	155335	102686	281030	178265	212291	156332	70275.6	77628.7	226643	20501.4	201129	265419
1-Undecene, 9-methyl-		Aliphatic (Hydrocarbon)	37.4266	74630-41-4	83	ng/ml	4606.48	2387.09	6022.66	9285.33	4714.82	7951.29	6593.88	5671.59	5836.09	7119.32	6493.97	1791.52	3487.02	4726.31	10628.7	5737.15	5188.21	15648.4	5918.96	6460.42	6357.94	3168.27	4184.19	5799.95	8896.3
2,4-Decadienal, (E,E)-	Benet2014; Gorbatov2014, Meynier1998, Jian_Zhao2017	Aldehydes	39.3733	25152-84-5	81	ng/ml	10492.1	6101.72	12543.6	9181.72	10637.7	9195.45	11922.9	7891.69	11058.2	6470.61	6218.42	3677.96	7227.46	6712.05	2332.41	35594.9	7699.27	4083.71	32731.2	480.624	5077.33	12225.6	2657.06	24092.9	5818.73
1-Tetradecanol	Machiels2003	Alcohol	46.2132	112-72-1	83	ng/ml	28667.6	5228.99	9987.66	102263	8748.63	28125.3	43610.7	16439.1	7658.36	2315.07	2742.98	38269.2	39038.9	71595.8	81071	97072.5	101533	3409.86	806.825	2131.96	1597.86	11973.7	63547.1	1389.61	182283
Phenol, 2,6-bis(1,1-dimethylethyl)-4-(1-methylpropyl)-	Lorenzo2014	Alicyclic hidrocarbons	47.1739	17540-75-9	233	ng/ml	95017.3	10782.3	37657.5	199988	129475	67491.9	32690	42122.2	25075	23368.2	47060.2	40195.1	75285.9	17126	95913.2	99132.9	23528.5	20196.5	38050.2	14863.3	20162.8	21346	34199.7	24057.9	296026
				N=black: B=White
			Total Aliphatic hydrocarbons (alkane)
			Total Aromatic and cyclic hycrocarbons (Branched, Furan, Lineal alkanes, hidrocarbons, lineal hydrocarbons)
			Total Hydrocarbons
			Total Aldehyde
			Total Ketone
			Total Esther and ether
			Total Alcohol
			Total Carboxilic acid (acid, fatty acid i carboxil acid)
			Total Furan
			Total Niitrogenous compounds
			Total Sulphur compounds
			Total Compounds

## Sheet: AU
Compound Method							C8d-C17-7	7-31-7-17	4-4371-c8d	1-4343-wb8d	4-4371-WB8D	4-4331-wb8d	2-419-17-wb8d	4-31-7-17-wb8d	1-4-9-17-wb8d	5-31-7-17-wb8d	3-4358-wb8d	5-4302-wb8d	2 negro-wb8d	4-4394-wb8d	B-17-7-wb8d	1-4388-wb8d	7-4364-wb8d	8-31-7-17-wb8d	2-4392-wb8d	9-31-7-17-wb8d	6-31-7-17-wb8d	3-4389-wb8d	A-17-7-wb8d	5-4330-wb8d	6-wb8d-B
							4372	4306	4371	4343	4371	4331	4356	4360	4340	4315	4358	4302	999	4394	4318	4388	4364	4354	4392	4387	4350	4389	FORA ESTUDI	4330	4373
							B	B	N	B	N	B	N	N	N	B	N	N	N	N	B	B	N	N	N	N	B	N	N	N	N
Name	REF AUTHORS	FAMILY	RT	CAS#	MZ	Units	Area	Area	Area	Area	Area	Area	Area	Area	Area	Area	Area	Area	Area	Area	Area	Area	Area	Area	Area	Area	Area	Area	Area	Area	Area
Methanethiol	Flores2018 (thomas2013)	Alcohol	2.14036	74-93-1	47	ng/ml	0.921091	0.396343	0.568448	0.790275	0.348925	0.34697	0.153649	0.288576	0.229575	0.540132	0.284583	0.422904	0.255571	2.25843	1.95127	1.25631	3.08549	1.62928	1.70854	2.8125	14.8227	17.2866	30.9089	2.40045	0.260729
Pentane	Gravador2014	Aliphatic (Hydrocarbon)	2.70977	109-66-0	43	ng/ml	4.20267	24.716	10.4586	32.2838	24.6974	17.1154	32.182	38.8114	34.1482	20.7683	57.3921	46.5811	74.8521	60.1892	93.3714	303.003	264.424	150.977	286.6	152.475	160.927	182.108	393.526	276.599	15.4132
Propanal	Benet2014, Gorbatov1980	Aldehydes	3.14743	123-38-6	58	ng/ml	27.8834	47.1672	81.9473	80.2988	50.208	80.6575	2.58667	46.8128	152.661	27.7819	17.3854	73.5881	27.8253	37.9664	143.601	58.6902	52.8436	119.356	19.9191	129.333	89.9559	74.0783	66.8803	42.729	38.0703
Acetone	Gorbatov1980	Ketones	3.25072	67-64-1	58	ng/ml	16.2189	33.3675	14.1678	80.8626	19.9343	80.8143	20.2126	29.9299	153.093	17.8813	17.6368	73.7078	28.0402	38.3998	144.548	59.604	53.8451	119.779	20.2446	130.065	90.4919	73.9761	66.7584	43.535	13.8461
Carbon disulfide	Gravador2014	Sulfur-containing	3.49253	75-15-0	76	ng/ml	24.7369	11.5604	13.4369	8.77063	10.327	11.9751	8.31425	10.7798	6.24653	8.50471	18.0744	12.2196	19.3159	19.3796	6.31754	4.91481	7.95347	7.441	6.27112	9.02686	12.3745	6.14192	9.57873	9.38296	6.50208
n-Hexane	Gravador2014, Machiels2003	Aliphatic (Hydrocarbon)	4.78564	110-54-3	57	ng/ml	358.599	48.729	32.3082	32.1881	27.8345	34.7695	55.3499	36.2819	31.6794	26.51	53.2946	24.9331	39.8236	36.9751	42.7806	55.8968	60.9697	63.73	51.0865	66.5768	51.257	60.8273	67.3257	69.0057	24.0677
Acetic acid ethenyl ester	Perez_Santaescolástica2018	Ester	5.99308	108-05-4	86	ng/ml	1.32928	#VALUE!	0.636314	0.881104	0.4306	8.48919	18.069	20.6869	1.05095	106.154	69.7067	270.459	65.741	57.073	139.283	9.85633	16.698	35.8609	9.65109	12.1942	74.5989	81.3577	35.5591	9.71564	1.99187
2-Butanone	Perez_Santaescolástica2018, Machiels2003, Gorbatov1980, Gravador2014	Ketones	6.24132	78-93-3	72	ng/ml	0.769081	1.11759	1.3934	1.52613	0.853629	1.73795	2.08908	2.34296	1.26247	2.37805	13.6047	3.76824	26.1075	4.50665	9.15113	5.46421	30.9786	7.58872	5.07582	20.2311	20.1662	21.5206	21.2542	12.0849	1.27283
Ethyl Acetate	Machiels2003	Ester	6.48339	141-78-6	43	ng/ml	1.44984	3.83615	1.05282	4.09094	0.524271	2.18382	3.12344	30.0911	3.82938	280.865	16.8545	795.773	45.5023	37.3023	78.1175	18.5145	9.51295	4.81914	5.16506	6.51367	13.9711	31.5762	19.7574	4.20224	0.355828
1-Propanol, 2-methyl-	Benet2014	Alcohol	8.70334	78-83-1	43	ng/ml	5.55826	1.09574	0.80174	4.41859	1.76995	34.7266	34.1912	140.001	21.2052	3.15729	7.94848	10.6508	36.0408	25.89	2.93933	41.4272	30.7786	13.7885	113.361	5.62621	2.80824	2.47039	4.54675	62.3396	0.0791926
Butanal, 3-methyl-	Perez_Santaescolastica2018, Machiels2003	Aldehydes	9.243	590-86-3	58	ng/ml	1.74624	1.26546	0.984175	4.31779	1.22954	34.5115	34.7407	156.08	19.7217	3.08735	4.72601	11.7187	1.22543	1.94865	3.56906	5.85044	0.870015	0.756893	0.410057	1.80187	0.49753	0.826962	11.5314	8.66853	0.698039
Butanal, 2-methyl-	Machiels2003, Gravador2014	Aldehydes	9.81321	96-17-3	58	ng/ml	2.33567	1.26546	0.984175	2.19081	1.22954	15.5584	32.0775	67.819	11.3424	1.59508	3.90354	0.631952	1.63615	0.427309	2.11401	6.01936	4.95897	0.154105	5.55333	3.3331	5.41255	9.22093	13.3371	10.447	0.802474
Heptane	Lorenzo2014, Ruben Dominguez2014, Gravador2014	Aliphatic (Hydrocarbon)	9.98956	142-82-5	100	ng/ml	1.01788	3.95476	2.54822	3.0045	2.55865	4.41271	8.24353	8.54889	6.58069	5.11332	13.2567	10.8731	22.6775	23.0172	33.2813	71.9632	64.5045	21.8	82.5567	43.0685	70.3986	119.749	176.735	135.341	5.15265
Acetic acid	Perez_Santaescolastica2018, Machiels2003,Kosowska2017, Jian_Zhao2017	Carboxilic acid	10.9057	64-19-7	60	ng/ml	3.22004	1.16265	2.39785	0.0289749	1.76451	1.9857	15.0807	1.71258	0.414667	3.82056	3.39308	12.8319	2.39652	0.914664	0.883051	16.5255	1.29205	1.61749	2.42071	1.62613	4.41873	1.52567	0.704499	16.3188	0.3895
Furan, 2-ethyl-	Lorenzo2014, Ruben Dominguez2014, Gravador2014	Furan	11.3029	3208-16-0	81	ng/ml	0.364914	0.71649	1.53284	1.79313	8.84779	3.87266	10.5928	7.16754	3.66855	4.43968	8.71543	8.03589	8.73629	10.5797	9.15937	23.2559	8.98324	13.0938	15.976	12.9841	11.7978	8.04439	5.21427	20.9552	10.2333
1-Butanol	Benet2014, Jian_Zhao2017	Alcohol	11.4327	71-36-3	56	ng/ml	1.65971	2.95653	2.01621	1.87117	2.51602	3.66513	11.1658	5.4521	6.29366	6.15288	10.9371	6.20113	7.73923	2.65859	2.82803	3.13108	1.65585	2.70196	3.44778	10.1913	6.19935	4.2216	4.89631	2.22126	7.59604
2-Pentanone	Perez_Santaescolastica2018, Lorenzo2014, Ruben_Dominguez2014, Machiels2003	Ketones	12.0512	107-87-9	86	ng/ml	6.99182	0.497877	0.475216	9.94748	0.537218	0.432735	0.878916	0.838977	0.951269	0.557458	0.76243	1.55842	1.26452	3.49045	9.25799	2.16704	4.47151	2.6226	2.57252	12.0336	14.2698	12.3715	12.113	2.18358	0.74051
Pentanal	Lorenzo2014 (Sciene Meat), Benet2014, Gorbatov1980, Gravador2014, Meynier1998, Jian_Zhao2017	Aldehydes	12.4	110-62-3	58	ng/ml	180.789	148.021	222.78	242.136	223.853	174.783	16.2191	129.297	169.095	135.303	4.27741	2.47897	2.56414	2.25599	1.82807	2.3226	2.48917	4.12477	2.39751	6.9738	2.88516	2.06865	3.44596	3.19501	54.5599
2,3-Pentanedione	Machiels2003, Gorbatov1980	Ketones	12.7544	600-14-6	100	ng/ml	5.78625	6.19443	7.62121	7.30887	6.9844	6.57168	4.7056	7.10316	5.96794	2.83024	1.48768	2.56223	1.20984	1.05083	1.14693	0.249455	0.351183	0.69474	0.26122	0.322761	0.732303	0.739295	0.387984	0.217818	4.44055
Acetoin	Gorbatov1980	Carboxilic acid	15.1334	513-86-0	45	ng/ml	0.566397	2.33859	0.580198	3.0514	0.392443	66.1171	198.898	213.726	4.08121	764.959	1242.33	6276.55	1642.44	1880.45	4257.4	254.963	513.083	1144.43	322.133	332.877	2696.45	2920.75	1263.68	212.814	1.95141
3-Buten-1-ol, 3-methyl-	Jian_Zhao2017	Alcohol	15.8186	763-32-6	56	ng/ml	2.94157	0.346027	0.489652	0.478375	0.504658	0.472686	4.64547	0.7528	0.567039	0.722206	3.72848	0.987648	3.9698	55.9847	1.93096	82.0484	36.8604	55.1292	17.8161	44.3359	15.8075	12.4643	24.2594	60.1656	0.605278
Toluene	Lorenzo2014, Ruben Dominguez2014, Gravador2014, Meynier1998	Aromatic and Cyclic (Hydrocarbons)	15.9151	108-88-3	91	ng/ml	5.05893	2.85352	11.8852	6.68537	6.0552	6.42404	12.7159	14.1165	4.53026	13.4671	4.06472	11.7408	5.2384	10.5882	9.12854	21.0887	4.75262	4.47431	14.56	5.22698	10.2457	18.0277	13.2961	8.34622	6.60184
1-Butanol, 3-methyl-	Perez_Santaescolastica2018	Alcohol	16.0801	123-51-3	55	ng/ml	0.277388	0.316841	0.5829	0.583676	0.688965	3.92806	49.6788	21.6899	2.01059	0.771878	184.736	21.8476	260.975	540.874	312.551	734.309	335.795	494.946	169.04	443.059	149.994	117.268	223.413	542.297	0.572627
1-Octene	Machiels2003	Aliphatic (Hydrocarbon)	16.43	111-66-0	70	ng/ml	0.436737	0.955882	7.44445	8.02865	1.41924	0.839734	9.6305	14.7953	0.768701	2.08656	17.2007	17.8221	25.7245	23.114	12.4744	102.335	32.314	32.0421	46.3802	31.5201	71.4396	129.136	168.19	81.9139	12.1475
Cyclopropane, pentyl-	Lorenzo2014	Aromatic and Cyclic (Hydrocarbons)	16.4358	2511-91-3	56	ng/ml	2.86695	6.56941	7.89942	0.505106	0.408054	0.447123	5.53643	16.855	0.569733	0.725491	1.84699	1.2338	45.3433	44.4179	10.6433	7.90458	67.4288	63.4843	64.4006	18.5174	4.46013	141.579	183.683	126.968	11.99
3-Hydroxy-3-methyl-2-butanone	Perez_Santaescolastica2018, Gravador2014	ketones	16.5068	115-22-0	59	ng/ml	0.0551601	0.015568	0.033692	0.107527	0.0835669	0.0789268	0.315476	0.1905	0.0161874	0.121932	0.528068	0.635803	1.2818	1.44866	8.98482	4.17974	0.852267	0.946882	2.10828	1.09555	14.4769	3.06689	2.25414	4.26836	0.166161
Octane	Perez_Santaescolastica2018, Lorenzo2014	Aliphatic (Hydrocarbon)	16.7499	111-65-9	85	ng/ml	6.97117	17.822	24.0914	27.288	22.3322	28.5324	34.2619	50.1798	35.6736	39.409	51.645	62.3383	94.1972	106.03	123.784	361.444	223.44	77.6673	338.061	147.187	264.161	481.136	630.307	564.654	41.5221
1-Pentanol	Lorenzo2014, Gravador2014, Meynier1998, Jian_Zhao2017	Alcohol	17.8728	71-41-0	55	ng/ml	96.6257	175.527	129.535	113.191	203.489	185.284	428.949	280.306	293.401	344.191	491.583	320.461	494.799	437.003	275.337	331.693	315.054	329.72	367.966	496.995	350.24	346.312	352.459	287.051	394.653
Hexanal	Perez_Santaescolastica2018, Lorenzo2014, Ruben_Dominguez2014, Machiels2003, Benet2014, Gorbatov1980, Gravador2014, Jian_Zhao2017	Aldehydes	18.7597	66-25-1	56	ng/ml	2727.64	2311.51	2908.1	3101.43	3197.44	2520.88	965.311	2354.4	2413.34	2567.54	57.9964	170.389	48.9115	37.8163	11.1305	21.0884	16.6695	32.2431	29.9315	16.366	21.6946	19.9396	6.73509	17.5114	2447.42
2,3-Butanediol	Jian_Zhao2017	Alcohol	20.7288	513-85-9	45	ng/ml			0.161533				0.399005	15.7305	16.9971	0.381468	1.90979	27.2212	0.385657	1.04226	121.505	2.38467	20.8832	8.27402	0.434217	60.5516	123.165	126.468	61.1345	17.4048
2,3-Butanediol, [S-(R*,R*)]-	Jian_Zhao2017	Alcohol	21.1199	19132-06-0	45	ng/ml		5.38217	6.84515		7.46944		1.41572	5.31774		0.664063	7.51821	27.2212	3.7971	2.75122	6.36306	46.9573	30.0344	13.9605	6.83362	18.7933	38.777	35.0334	24.7193	67.7062
Butanoic acid	Jian_Zhao2017	Carboxilic acid	21.2066	107-92-6	60	ng/ml	2.94148	2.82976	4.47409	0.416015	2.76007	2.69459	4.61941	1.60205	0.599246	2.47067	2.21483	0.598471	1.36579	0.286393	0.36072	2.53806	0.965362	1.05728	2.06698	0.418703	3.37281	1.72121	26.3704	3.15343	0.490149
Benzene, 1,3-dimethyl-	Gravador2014; Jian_Zhao2017	Aromatic and Cyclic (Hydrocarbons)	21.5184	108-38-3	91	ng/ml	1.75805	2.16263	7.98059	1.94556	2.22732	3.08762	7.54406	9.1651	6.37083	9.48728	2.1221	1.97716	1.6551	2.82236	3.2482	22.9403	2.35723	2.74496	12.1436	2.91319	2.225	1.36339	1.93929	3.70123	4.43384
1-Octen-3-one	Benet2014	Ketones	21.5474	4312-99-6	70	ng/ml	0.740699	1.13878	1.66004	0.313939	1.90778	1.56502	1.40409	1.96485	0.826802	2.30225	1.97533	1.81792	1.02481	1.76574	9.25752	2.68811	2.51122	1.62613	2.26179	2.13197	3.05523	3.22405	1.75138	3.59498	4.26321
Nonane	Lorenzo2014, Jian_Zhao2017	Aliphatic (Hydrocarbon)	21.9676	111-84-2	57	ng/ml	0.549819	0.885421	1.01073	1.05622	1.47696	30.4735	215.618	2.03754	1.02728	58.3908	274.215	159.549	293.884	296.507	77.5087	245.628	216.888	129.669	290.458	157.58	175.821	144.616	176.166	226.709	133.698
2-n-Butyl furan	Lorenzo2014, Ruben Dominguez2017	Furan	22.3398	4466-24-4	81	ng/ml	1.05553	0.721094	2.6544	3.0928	3.18607	2.98338	2.76374	4.68553	2.57201	3.7691	2.92692	2.87979	3.13353	5.46252	4.15765	13.1112	3.75117	3.60249	7.00465	4.013	3.77185	4.46719	3.16764	8.11026	6.85772
1-Hexanol	Perez_Santaescolastica2018, Lorenzo2014, Benet2014, Jian_Zhao2017	Alcohol	22.8366	111-27-3	56	ng/ml	14.5234	14.5163	38.2077	24.7523	27.2608	383.404	2529.22	252.619	51.433	758.424	3178.88	1893.91	3410.01	3466.82	974.107	2837.46	2557.16	1539.98	3443.94	1902.96	2099.93	1721.13	2121.09	2687.96	1581.54
2-Heptanone	Perez_Santaescolastica2018; Lorenzo2014, Ruben Dominguez2014. Machiels2003, Benet2014, Meynier1998, Jian_Zhao2017	Ketones	23.3919	110-43-0	58	ng/ml	6.20706	5.50528	15.9332	16.4319	19.8434	17.0191	27.1998	34.4899	19.1017	30.0728	31.0604	33.0904	36.3054	69.1886	53.4189	80.453	49.8337	42.4605	60.876	54.8457	70.0677	59.5362	45.2167	71.8961	47.2322
Butanoic acid, 3-methyl-	Machiels2003	Carboxilic acid	23.4872	503-74-2	60	ng/ml	0.190403	0.227627	0.148014	0.10393	0.152729	0.181095	0.335421	0.274598	0.12179	0.683049	1.32132	13.1653	0.667822	0.377078	16.7471	1.9665	3.44336	2.25129	0.695528	5.18175	19.2336	57.6508	21.6646	2.50213	0.379208
Heptanal	Perez_Santaescolastica2018, Lorenzo2014, Rube_ Dominguez2014, Machiels2003, Gorbatov1980, gravador2014, Meynier1998, Jian_Zhao2017	Aldehydes	23.7076	111-71-7	70	ng/ml	53.4583	42.2025	77.0048	77.2363	77.7481	63.2584	52.3423	89.1568	91.1096	86.1411	120.454	7.32251	128.986	130.738	2.90616	107.917	4.90046	15.4458	129.461	3.66881	4.67729	5.73715	4.22846	6.10607	80.7666
2-Heptenal, (Z)-	Benet2014, Meynier1998, Jian_Zhao2017	Aldehydes	26.6413	57266-86-1	83	ng/ml	2.2006	2.58966	4.58772	3.49504	4.45485	4.24602	6.16759	6.47094	6.03572	6.13385	4.7297	3.59477	4.92891	6.27612	3.23977	10.2801	4.49904	5.2255	6.108	3.27971	3.01629	5.84665	3.31329	7.73413	6.35214
Furan, 2-pentyl-	Lorenzo2014, Ruben Dominguez2014, Benet2014, Gravador2014, Meynier1998, Jian_Zhao2017	Furan	26.648	3777-69-3	81	ng/ml	16.7173	12.2127	45.5847	43.7195	61.4057	45.8377	64.7314	88.1158	49.3035	77.3666	75.3809	74.4856	81.1659	161.269	91.4314	266.862	121.872	100.283	155.459	86.3718	80.4381	125.058	95.1511	213.111	105.401
Benzaldehyde	Lorenzo2014, Ruben Dominguez2014, Gorbatov1980, Gravador014, Jian_Zhao2017	Aldehydes	26.9826	100-52-7	106	ng/ml	8.26728	9.14834	15.3938	15.0738	14.9137	14.6189	8.36457	25.8473	12.0108	21.3537	2.44233	19.1068	2.1356	2.20674	4.64072	2.4939	1.72752	1.95602	2.10384	2.4189	3.61295	5.73994	2.08979	2.3986	10.6408
1-Heptanol	Machiels2003, Benet2014, Jian_Zhao2017	Alcohol	27.0014	111-70-6	56	ng/ml	12.0265	7.91975	16.7391	13.6661	15.2292	191.124	23.1726	16.3228	13.4634	20.2354	40.883	30.9844	53.5608	59.1702	31.2552	51.57	45.3184	23.7487	66.1361	44.934	43.2602	56.1103	52.1074	57.742	29.3549
2-Butenal, (Z)-	Machiels2003	Aldehydes	27.0135	15798-64-8	70	ng/ml	3.97565	4.85549	8.1073	4.65523	8.71012	6.44397	30.8419	20.0931	17.2586	22.6928	54.4893	44.6284	72.636	80.1886	40.6425	67.0056	61.801	31.8774	89.4857	66.0142	63.4182	73.2498	68.031	77.8718	35.8901
1-Octen-3-ol	Perez_Santaescolastica2018, Lorenzo2014, Machiels2003, Benet2014, Gravador2014, Meynier1998, Jian_Zhao2017	Alcohol	27.2548	3391-86-4	57	ng/ml	171.392	109.866	328.341	252.628	301.211	271.821	351.983	376.153	277.585	375.949	278.68	415.616	348.718	681.279	451.456	750.664	419.2	443.821	526.727	527.258	425.319	560.626	455.776	616.602	379.334
2-Octanone	Machiels2003, Benet2014	Ketones	27.6123	111-13-7	58	ng/ml	2.58816	1.3359	2.5966	1.48776	1.77351	1.2258	1.75354	1.2831	1.09401	1.47139	1.43014	2.02092	1.94563	3.00107	2.83689	10.4721	2.94617	4.24514	5.832	2.37204	1.43344	2.04513	3.39019	5.56509	1.52902
Acetic acid, butyl ester	Jian_Zhao2017	Ester	27.8755	123-86-4	56	ng/ml	16.6077	14.2979	22.4242	22.1697	21.6287	16.5386	24.1401	36.3575	3.2873	24.9827	12.041	2.80366	6.95467	10.7201	2.24114	6.63004	4.20893	33.4894	3.97212	2.96128	3.30264	4.93766	2.99159	6.11916	33.9436
Octanal	Lorenzo2014, Ruben Dominguez2014, Machiels2013, Benet2014, Gorbatov2014, Gravador2014, Meynier1998	Aldehydes	27.9498	124-13-0	84	ng/ml	18.806	12.8937	25.1494	21.2472	23.8537	19.0343	23.7795	36.7753	26.5256	27.6644	12.9857	6.55025	3.51003	9.12046	0.303675	5.05824	2.43836	23.131	3.72251	0.717675	1.30791	2.14505	2.60658	7.09726	39.369
Hexane, 2,4,4-trimethyl-	Jian_Zhao2017	Aliphatic (Hydrocarbon)	28.0629	16747-30-1	71	ng/ml	185.941	104.678	244.856	228.84	271.657	169.547	162.993	9.70081	114.064	10.2736	7.30416	7.98845	5.73839	7.94935	5.43157	14.7067	9.42435	5.4138	9.26061	5.9828	8.63266	13.1722	11.4124	10.9994	23.8691
Pentanoic acid	Machiels2003, Jian_Zhao2017	Carboxilic acid	28.7542	109-52-4	60	ng/ml	19.6521	21.6999	13.7163	3.07566	7.16034	7.91098	21.6246	15.4712	5.38749	7.00767	6.94392	3.08641	5.43616	3.1273	1.49758	15.2542	2.58054	5.96039	8.91457	1.14523	3.09307	1.24194	0.338824	24.3449	3.83772
Heptane, 3,3,4-trimethyl-	Lorenzo2014	Aliphatic (Hydrocarbon)	28.9814	20278-87-9	71	ng/ml	3.68124	1.66002	3.7114	2.03874	2.98722	2.15756	2.49118	3.12717	1.6947	3.41106	2.7006	2.9861	2.27254	2.8668	1.69635	6.33478	3.14438	2.27613	3.67333	2.25959	2.84872	4.64118	4.53453	4.48815	8.67329
2-Ethyl-1-hexanol	RubenDominguez2014, Machiels2003, Benet2014	Alcohol	29.2416	1000411-44-8	57	ng/ml	5.7092	1.60665	5.55357	3.93738	4.01699	4.6277	2.08248	3.02738	2.52559	4.11498	2.57477	2.39149	1.94645	2.55058	1.92147	5.58833	3.14406	2.10106	3.67786	4.43523	2.62121	7.43254	3.43254	3.25227	7.87659
Undecane	Perez_Santaescolastica2018, lorenzo2014	Aliphatic (Hydrocarbon)	30.1191	1120-21-4	57	ng/ml	91.2933	27.5736	78.4883	57.4669	51.0527	41.2905	44.5572	60.8247	39.8739	63.3059	44.6688	51.1009	39.9689	54.7367	35.1607	114.701	59.5316	43.393	67.7131	37.8938	47.5339	89.3243	3.98581	61.2068	113.041
2-Octenal, (E)-	Benet2014, Meynier1998, Jian_Zhao2017	Aldehydes	30.5737	2548-87-0	83	ng/ml	1.02716	1.40293	1.95693	1.36378	1.43897	1.61354	3.3527	2.25509	2.61147	1.75213	1.46455	0.701226	1.49348	20.6645	9.07065	1.40615	17.1695	1.33806	1.69991	9.73288	9.56101	18.4834	16.5495	1.25188	1.44542
1-Octanol	Benet2014, Jian_Zhao2017	Alcohol	30.7382	111-87-5	56	ng/ml	2.83594	2.26652	7.46337	3.75884	7.44414	5.73865	11.181	13.8763	11.6183	15.814	16.6452	16.3963	23.8601	39.0079	19.0568	34.4322	32.657	13.6503	44.721	20.3791	20.0475	36.2004	30.9614	39.9589	19.2844
Heptane, 4-methylene-	Perez_Santaescolastica2018	Aliphatic (Hydrocarbon)	30.7384	15918-08-8	55	ng/ml	1.66159	1.88495	3.88319	2.32259	4.35486	3.33883	7.58594	13.3856	7.11362	8.48462	17.051	17.2147	23.3315	25.3602	18.4014	28.991	31.8001	10.7035	39.7571	20.1767	18.4716	34.735	30.3154	40.154	18.9237
Pentanoic acid, 2-methyl-, anhydride	Gravador2014	Carboxilic acid	31.1933	63169-61-9	99	ng/ml	1.89935	1.72097	11.5989	4.59724	8.14903	9.77744	27.8732	22.7986	25.5451	20.5698	5.95282	9.87055	12.2455	12.7653	22.1885	21.4483	8.84098	13.8759	26.4264	12.8541	27.5471	16.5884	4.85346	13.3792	11.899
Nonanal	Lorenzo2014, Ruben_Dominguez2014, Machiels2003, Benet2014, Gorbatov1980, Gravador2014, Meynier1998, Jian_Zhao2017	Aldehydes	31.7105	124-19-6	98	ng/ml	22.042	14.7938	23.0827	24.5325	24.3514	21.651	27.2213	33.5594	30.4213	30.0879	20.2351	7.64844	18.452	6.07701	0.720259	5.83776	6.20284	6.78278	14.1431	1.208	1.1796	1.35852	0.673845	3.07583	36.2905
Phenylethyl Alcohol	Jian_Zhao2017	Alcohol	33.3067	60-12-8	91	ng/ml	0.107624	0.171931	0.164441	0.0372365	0.0183368	0.142928	0.680609	1.06276	0.0340953	0.0207629	3.9116	0.915901	4.25414	5.07177	20.7802	22.2692	9.36451	12.298	1.51262	29.6755	10.1075	6.64857	17.3662	20.8702	0.241387
Dodecane	Perez_Santaescolastica2018, Lorenzo2014, Ruben Dominguez2014, Jian Zhao2017	Aliphatic (Hydrocarbon)	33.5717	112-40-3	57	ng/ml	62.6665	19.5109	50.2579	31.1739	24.8024	21.6309	24.8694	35.6536	24.1346	41.1371	31.7358	32.7649	27.2511	36.126	24.3727	68.0728	40.8415	38.7684	38.2995	21.3821	23.8053	55.3474	2.84913	39.5835	65.2743
1-Nonanol	Benet2014	Alcohol	34.1565	143-08-8	56	ng/ml	11.8192	0.219253	8.82815	0.439076	0.247728	0.264237	0.737544	0.494727	0.529355	0.591499	2.48484	0.812211	3.71743	9.36897	1.38972	18.4406	11.3137	1.46844	22.4266	1.84422	1.8226	3.83705	4.47664	23.6395	0.615345
1-Nonene	Machiels2003	Aliphatic (Hydrocarbon)	34.1667	124-11-8	83	ng/ml	0.370806	0.376661	0.442269	0.339882	0.534162	0.565713	0.998244	1.04885	1.04542	0.811264	1.66752	0.833226	2.05528	5.07351	0.762127	9.23105	5.61677	1.08617	10.8152	1.09051	0.883759	1.73458	1.82272	11.3982	1.26359
Octanoic acid	Lorenzo2014, Benet2014, Jian_Zhao2017	Carboxilic acid	35.1836	124-07-2	60	ng/ml	2.23859	2.85179	1.08406	0.0643914	0.368059	1.97082	0.481968	1.33614	0.419181	0.304122	0.325992	0.0112911	0.425488	0.143554		0.369355	0.0145289	0.120226	0.161888		0.026664	0.0538194	0.0247394	0.378239	0.375351
Tridecane	Perez_Santaescolastica2018, lorenzo2014, Ruben Dominguez2014, meynier1998, jian_Zhao2017	Aliphatic (Hydrocarbon)	36.7544	629-50-5	57	ng/ml	21.9388	13.8379	16.356	7.92529	7.33336	6.57936	6.91195	12.6758	9.81028	15.4627	14.9584	13.0459	11.201	15.5335	10.2686	28.103	17.8265	21.2291	15.6332	7.02756	7.76287	22.6643	2.05014	20.1129	26.5419
1-Undecene, 9-methyl-		Aliphatic (Hydrocarbon)	37.4266	74630-41-4	83	ng/ml	0.460648	0.238709	0.602266	0.928533	0.471482	0.795129	0.659388	0.567159	0.583609	0.711932	0.649397	0.179152	0.348702	0.472631	1.06287	0.573715	0.518821	1.56484	0.591896	0.646042	0.635794	0.316827	0.418419	0.579995	0.88963
2,4-Decadienal, (E,E)-	Benet2014; Gorbatov2014, Meynier1998, Jian_Zhao2017	Aldehydes	39.3733	25152-84-5	81	ng/ml	1.04921	0.610172	1.25436	0.918172	1.06377	0.919545	1.19229	0.789169	1.10582	0.647061	0.621842	0.367796	0.722746	0.671205	0.233241	3.55949	0.769927	0.408371	3.27312	0.0480624	0.507733	1.22256	0.265706	2.40929	0.581873
1-Tetradecanol	Machiels2003	Alcohol	46.2132	112-72-1	83	ng/ml	2.86676	0.522899	0.998766	10.2263	0.874863	2.81253	4.36107	1.64391	0.765836	0.231507	0.274298	3.82692	3.90389	7.15958	8.1071	9.70725	10.1533	0.340986	0.0806825	0.213196	0.159786	1.19737	6.35471	0.138961	18.2283
Phenol, 2,6-bis(1,1-dimethylethyl)-4-(1-methylpropyl)-	Lorenzo2014	Alicyclic hidrocarbons	47.1739	17540-75-9	233	ng/ml	9.50173	1.07823	3.76575	19.9988	12.9475	6.74919	3.269	4.21222	2.5075	2.33682	4.70602	4.01951	7.52859	1.7126	9.59132	9.91329	2.35285	2.01965	3.80502	1.48633	2.01628	2.1346	3.41997	2.40579	29.6026

## Sheet:  LRI
LRI
pentano (pentane)	2.70977	500
hexano (n-hexane)	4.78564	600
heptano (heptane)	9.98956	700
octano (octane)	16.7499	800
NONANE	21.9676	900
decano		1000
undecano (undecane)	30.1191	1100
dodecano (dodecane)	33.5717	1200
tridecano (tridecane)	36.7544	1300
tetradecano		1400
Pentadecane		1500
Hexadecane		1600
Name	RT	LRI	R
		457.989
Pentane	2.70977	517.428	ms, lri,s
n-Hexane	4.78564	562.962	ms, lri
Heptane	9.98956	677.111	ms, lri
1-Octene	16.43	818.384	ms, lri
Octane	16.7499	825.401	ms, lri,s
Nonane	21.9676	939.851	ms, lri,s
Hexane, 2,4,4-trimethyl-	28.0629	1073.55	ms, lri
Heptane, 3,3,4-trimethyl-	28.9814	1093.7	ms, lri
Undecane	30.1191	1118.65	ms, lri,s
Heptane, 4-methylene-	30.7384	1132.24	ms, lri
Dodecane	33.5717	1194.39	ms, lri,s
1-Nonene	34.1667	1207.44	ms, lri
Tridecane	36.7544	1264.2	ms, lri,s
1-Undecene, 9-methyl-	37.4266	1278.95	ms,
Total Aliphatic hydrocarbons
Toluene	15.9151	807.089	ms, lri
Cyclopropane, pentyl-	16.4358	818.511	ms, lri
Benzene, 1,3-dimethyl-	21.5184	929.997	ms, lri
Phenol, 2,6-bis(1,1-dimethylethyl)-4-(1-methylpropyl)-	47.1739	1492.76	ms, lri
Total Aromatic and cyclic hycrocarbons
Total Hydrocarbons
Propanal	3.14743	527.028	ms, lri,s
Butanal, 3-methyl-	9.243	660.735	ms, lri
Butanal, 2-methyl-	9.81321	673.243	ms, lri
Pentanal	12.4	729.984	ms, lri,s
Hexanal	18.7597	869.485	ms, lri,s
Heptanal	23.7076	978.018	ms, lri,s
2-Heptenal, (Z)-	26.6413	1042.37	ms, lri
Benzaldehyde	26.9826	1049.86	ms, lri
2-Butenal, (Z)-	27.0135	1050.53	ms, lri
Octanal	27.9498	1071.07	ms, lri,s
2-Octenal, (E)-	30.5737	1128.63	ms, lri
Nonanal	31.7105	1153.56	ms, lri,s
2,4-Decadienal, (E,E)-	39.3733	1321.65	ms, lri
Total Aldehyde
Acetone	3.25072	529.294	ms, lri
2-Butanone	6.24132	594.893	ms, lri
2-Pentanone	12.0512	722.334	ms, lri
2,3-Pentanedione	12.7544	737.758	ms, lri
3-Hydroxy-3-methyl-2-butanone	16.5068	820.069	ms, lri
1-Octen-3-one	21.5474	930.634	ms, lri
2-Heptanone	23.3919	971.094	ms, lri
2-Octanone	27.6123	1063.67	ms, lri
Total Ketone
Acetic acid ethenyl ester	5.99308	589.448	ms, lri
Ethyl Acetate	6.48339	600.203	ms, lri
Acetic acid, butyl ester	27.8755	1069.44	ms, lri
Total Esther and ether
Methanethiol	2.14036	504.938	ms, lri
1-Propanol, 2-methyl-	8.70334	648.898	ms, lri
1-Butanol	11.4327	708.767	ms, lri
3-Buten-1-ol, 3-methyl-	15.8186	804.972	ms, lri
1-Butanol, 3-methyl-	16.0801	810.709	ms, lri
1-Pentanol	17.8728	850.03	ms, lri
2,3-Butanediol	20.7288	912.679	ms, lri
2,3-Butanediol, [S-(R*,R*)]-	21.1199	921.257	ms, lri
1-Hexanol	22.8366	958.914	ms, lri
1-Heptanol	27.0014	1050.27	ms, lri
1-Octen-3-ol	27.2548	1055.83	ms, lri
2-Ethyl-1-hexanol	29.2416	1099.41	ms, lri
1-Octanol	30.7382	1132.23	ms, lri
Phenylethyl Alcohol	33.3067	1188.58	ms, lri
1-Nonanol	34.1565	1207.22	ms, lri
1-Tetradecanol	46.2132	1471.68	ms, lri
Total Alcohol
Acetic acid	10.9057	697.207	ms, lri
Acetoin	15.1334	789.942	ms, lri
Butanoic acid	21.2066	923.158	ms, lri
Butanoic acid, 3-methyl-	23.4872	973.184	ms, lri
Pentanoic acid	28.7542	1088.72	ms, lri
Pentanoic acid, 2-methyl-, anhydride	31.1933	1142.22	ms, lri
Octanoic acid	35.1836	1229.75	ms, lri
Total Carboxilic acid
Carbon disulfide	3.49253	534.598	ms, lri
Total Sulphur compounds
Total Compounds

## Sheet: jmp_orig
Compound Method	crotal	id	number	genetictype	gender	%lean	clasif	Name	sum_lipolysis	sum_proteolysis	sum_microbial	sum_unknown	sum total	sum total verif	perc_lipolysis	perc_proteolysis	perc_microbial	perc_unknown	perc total	Methanethiol	Pentane	Propanal	Acetone	Carbon disulfide	n-Hexane	Acetic acid ethenyl ester	2-Butanone	Ethyl Acetate	1-Propanol, 2-methyl-	Butanal, 3-methyl-	Butanal, 2-methyl-	Heptane	Acetic acid	Furan, 2-ethyl-	1-Butanol	2-Pentanone	Pentanal	2,3-Pentanedione	Acetoin	3-Buten-1-ol, 3-methyl-	Toluene	1-Butanol, 3-methyl-	1-Octene	Cyclopropane, pentyl-	3-Hydroxy-3-methyl-2-butanone	Octane	1-Pentanol	Hexanal	2,3-Butanediol
2 negro-wb8d	999	2-NEGRO	999	black				Area	5403.63	374.504	1800.56	110.066	7688.76	7688.76	70.2796	4.87079	23.4181	1.43152	100	0.255571	74.8521	27.8253	28.0402	19.3159	39.8236	65.741	26.1075	45.5023	36.0408	1.22543	1.63615	22.6775	2.39652	8.73629	7.73923	1.26452	2.56414	1.20984	1642.44	3.9698	5.2384	260.975	25.7245	45.3433	1.2818	94.1972	494.799	48.9115	0.385657
5-4302-wb8d	4302	5_4302	4302	black	male	55.27	less60	Area	3560.03	159.54	7421.62	56.5197	11197.7	11197.7	31.7925	1.42475	66.278	0.504743	100	0.422904	46.5811	73.5881	73.7078	12.2196	24.9331	270.459	3.76824	795.773	10.6508	11.7187	0.631952	10.8731	12.8319	8.03589	6.20113	1.55842	2.47897	2.56223	6276.55	0.987648	11.7408	21.8476	17.8221	1.2338	0.635803	62.3383	320.461	170.389	27.2212
7-31-7-17	4306	7-31/7/17	4306	white	male	56.63	less60	Area	3133.43	44.5403	13.9872	133.714	3325.67	3325.67	94.2195	1.33929	0.420584	4.02066	100	0.396343	24.716	47.1672	33.3675	11.5604	48.729		1.11759	3.83615	1.09574	1.26546	1.26546	3.95476	1.16265	0.71649	2.95653	0.497877	148.021	6.19443	2.33859	0.346027	2.85352	0.316841	0.955882	6.56941	0.015568	17.822	175.527	2311.51
5-31-7-17-wb8d	4315	5-31/7/17	4315	white	male	55.53	less60	Area	4785.07	121.57	1160.02	82.4852	6149.14	6149.14	77.8168	1.97702	18.8648	1.34141	100	0.540132	20.7683	27.7819	17.8813	8.50471	26.51	106.154	2.37805	280.865	3.15729	3.08735	1.59508	5.11332	3.82056	4.43968	6.15288	0.557458	135.303	2.83024	764.959	0.722206	13.4671	0.771878	2.08656	0.725491	0.121932	39.409	344.191	2567.54	0.381468
B-17-7-wb8d	4318	B-17/7	4318	white	female	61.99	S	Area	2678.8	444.321	4627.27	88.4355	7838.84	7838.84	34.1735	5.6682	59.0301	1.12817	100	1.95127	93.3714	143.601	144.548	6.31754	42.7806	139.283	9.15113	78.1175	2.93933	3.56906	2.11401	33.2813	0.883051	9.15937	2.82803	9.25799	1.82807	1.14693	4257.4	1.93096	9.12854	312.551	12.4744	10.6433	8.98482	123.784	275.337	11.1305	121.505
5-4330-wb8d	4330	5-4330	4330	black	male	56.1	less60	Area	5563.41	854.844	411.371	224.618	7054.24	7054.24	78.8661	12.1182	5.83154	3.18415	100	2.40045	276.599	42.729	43.535	9.38296	69.0057	9.71564	12.0849	4.20224	62.3396	8.66853	10.447	135.341	16.3188	20.9552	2.22126	2.18358	3.19501	0.217818	212.814	60.1656	8.34622	542.297	81.9139	126.968	4.26836	564.654	287.051	17.5114	17.4048
4-4331-wb8d	4331	4-4331	4331	white	female	60.7	S	Area	4250.72	138.63	113.645	214.262	4717.26	4717.26	90.11	2.93878	2.40914	4.54209	100	0.34697	17.1154	80.6575	80.8143	11.9751	34.7695	8.48919	1.73795	2.18382	34.7266	34.5115	15.5584	4.41271	1.9857	3.87266	3.66513	0.432735	174.783	6.57168	66.1171	0.472686	6.42404	3.92806	0.839734	0.447123	0.0789268	28.5324	185.284	2520.88
1-4-9-17-wb8d	4340	1-4/9/17	4340	black	male	56.79	less60	Area	3945.99	110.047	47.6126	159.263	4262.92	4262.92	92.5656	2.5815	1.1169	3.73601	100	0.229575	34.1482	152.661	153.093	6.24653	31.6794	1.05095	1.26247	3.82938	21.2052	19.7217	11.3424	6.58069	0.414667	3.66855	6.29366	0.951269	169.095	5.96794	4.08121	0.567039	4.53026	2.01059	0.768701	0.569733	0.0161874	35.6736	293.401	2413.34	16.9971
1-4343-wb8d	4343	1-4343	4343	white	female	63.8	S	Area	4301.25	87.275	12.5082	286.494	4687.53	4687.53	91.7595	1.86185	0.266841	6.11184	100	0.790275	32.2838	80.2988	80.8626	8.77063	32.1881	0.881104	1.52613	4.09094	4.41859	4.31779	2.19081	3.0045	0.0289749	1.79313	1.87117	9.94748	242.136	7.30887	3.0514	0.478375	6.68537	0.583676	8.02865	0.505106	0.107527	27.288	113.191	3101.43
6-31-7-17-wb8d	4350	6-31/7/17	4350	white	male	53.21	less60	Area	4244.91	305.547	2964.3	90.6726	7605.42	7605.42	55.8142	4.01749	38.9761	1.19221	100	14.8227	160.927	89.9559	90.4919	12.3745	51.257	74.5989	20.1662	13.9711	2.80824	0.49753	5.41255	70.3986	4.41873	11.7978	6.19935	14.2698	2.88516	0.732303	2696.45	15.8075	10.2457	149.994	71.4396	4.46013	14.4769	264.161	350.24	21.6946	123.165
8-31-7-17-wb8d	4354	8-31/7/17	4354	black	male	63.27	S	Area	3381.81	667.343	1235.05	137.059	5421.26	5421.26	62.3805	12.3097	22.7816	2.52817	100	1.62928	150.977	119.356	119.779	7.441	63.73	35.8609	7.58872	4.81914	13.7885	0.756893	0.154105	21.8	1.61749	13.0938	2.70196	2.6226	4.12477	0.69474	1144.43	55.1292	4.47431	494.946	32.0421	63.4843	0.946882	77.6673	329.72	32.2431	8.27402
2-419-17-wb8d	4356	2-4/9/17	4356	black	female	61.28	S	Area	5025.06	209.83	271.858	246.086	5752.84	5752.84	87.3493	3.64741	4.72563	4.27765	100	0.153649	32.182	2.58667	20.2126	8.31425	55.3499	18.069	2.08908	3.12344	34.1912	34.7407	32.0775	8.24353	15.0807	10.5928	11.1658	0.878916	16.2191	4.7056	198.898	4.64547	12.7159	49.6788	9.6305	5.53643	0.315476	34.2619	428.949	965.311	0.399005
3-4358-wb8d	4358	3-4358	4358	black	male	57.9	less60	Area	4965.8	298.66	1353.57	55.8117	6673.84	6673.84	74.4068	4.47508	20.2818	0.836276	100	0.284583	57.3921	17.3854	17.6368	18.0744	53.2946	69.7067	13.6047	16.8545	7.94848	4.72601	3.90354	13.2567	3.39308	8.71543	10.9371	0.76243	4.27741	1.48768	1242.33	3.72848	4.06472	184.736	17.2007	1.84699	0.528068	51.645	491.583	57.9964	1.90979
4-31-7-17-wb8d	4360	4-31/7/17	4360	black	male	53.78	less60	Area	4039.69	381.778	428.329	119.233	4969.03	4969.03	81.2974	7.68315	8.61996	2.39952	100	0.288576	38.8114	46.8128	29.9299	10.7798	36.2819	20.6869	2.34296	30.0911	140.001	156.08	67.819	8.54889	1.71258	7.16754	5.4521	0.838977	129.297	7.10316	213.726	0.7528	14.1165	21.6899	14.7953	16.855	0.1905	50.1798	280.306	2354.4	15.7305
7-4364-wb8d	4364	7-4364	4364	black	male	58.1	less60	Area	4709.41	520.061	631.647	135.797	5996.92	5996.92	78.5306	8.67214	10.5329	2.26444	100	3.08549	264.424	52.8436	53.8451	7.95347	60.9697	16.698	30.9786	9.51295	30.7786	0.870015	4.95897	64.5045	1.29205	8.98324	1.65585	4.47151	2.48917	0.351183	513.083	36.8604	4.75262	335.795	32.314	67.4288	0.852267	223.44	315.054	16.6695	20.8832
4-4371-c8d	4371	4_4371	4371	black	male	60.1	S	Area	4180.45	91.3475	12.64	307.391	4591.82	4591.82	91.0411	1.98935	0.275273	6.6943	100	0.568448	10.4586	81.9473	14.1678	13.4369	32.3082	0.636314	1.3934	1.05282	0.80174	0.984175	0.984175	2.54822	2.39785	1.53284	2.01621	0.475216	222.78	7.62121	0.580198	0.489652	11.8852	0.5829	7.44445	7.89942	0.033692	24.0914	129.535	2908.1	0.161533
4-4371-WB8D	4371	4_4371	4371	black	male	60.1	S	Area	4407.29	101.802	12.3695	326.29	4847.75	4847.75	90.9141	2.09999	0.255161	6.73076	100	0.348925	24.6974	50.208	19.9343	10.327	27.8345	0.4306	0.853629	0.524271	1.76995	1.22954	1.22954	2.55865	1.76451	8.84779	2.51602	0.537218	223.853	6.9844	0.392443	0.504658	6.0552	0.688965	1.41924	0.408054	0.0835669	22.3322	203.489	3197.44
C8d-C17-7	4372	C-17/7	4372	white	female	63.8	S	Area	3965.5	69.6292	12.2314	224.424	4271.79	4271.79	92.8301	1.62998	0.286331	5.25362	100	0.921091	4.20267	27.8834	16.2189	24.7369	358.599	1.32928	0.769081	1.44984	5.55826	1.74624	2.33567	1.01788	3.22004	0.364914	1.65971	6.99182	180.789	5.78625	0.566397	2.94157	5.05893	0.277388	0.436737	2.86695	0.0551601	6.97117	96.6257	2727.64
6-wb8d-B	4373	6	4373	black	male	57.19	less60	Area	5711.99	138.18	5.00919	139.149	5994.33	5994.33	95.2899	2.30517	0.0835654	2.32135	100	0.260729	15.4132	38.0703	13.8461	6.50208	24.0677	1.99187	1.27283	0.355828	0.0791926	0.698039	0.802474	5.15265	0.3895	10.2333	7.59604	0.74051	54.5599	4.44055	1.95141	0.605278	6.60184	0.572627	12.1475	11.99	0.166161	41.5221	394.653	2447.42
9-31-7-17-wb8d	4387	9-31/7/17	4387	black	female	58.18	less60	Area	4152.24	603.1	467.857	70.0377	5293.23	5293.23	78.4443	11.3938	8.83878	1.32316	100	2.8125	152.475	129.333	130.065	9.02686	66.5768	12.1942	20.2311	6.51367	5.62621	1.80187	3.3331	43.0685	1.62613	12.9841	10.1913	12.0336	6.9738	0.322761	332.877	44.3359	5.22698	443.059	31.5201	18.5174	1.09555	147.187	496.995	16.366	60.5516
1-4388-wb8d	4388	1-4388	4388	white	female	63.8	S	Area	5916.07	1111.56	412.898	124.667	7565.19	7565.19	78.2012	14.6931	5.45787	1.64791	100	1.25631	303.003	58.6902	59.604	4.91481	55.8968	9.85633	5.46421	18.5145	41.4272	5.85044	6.01936	71.9632	16.5255	23.2559	3.13108	2.16704	2.3226	0.249455	254.963	82.0484	21.0887	734.309	102.335	7.90458	4.17974	361.444	331.693	21.0884	2.38467
3-4389-wb8d	4389	3_4389	4389	black	male	46.51	less60	Area	4412.88	359.829	3205.83	236.293	8214.83	8214.83	53.7185	4.38024	39.0249	2.87643	100	17.2866	182.108	74.0783	73.9761	6.14192	60.8273	81.3577	21.5206	31.5762	2.47039	0.826962	9.22093	119.749	1.52567	8.04439	4.2216	12.3715	2.06865	0.739295	2920.75	12.4643	18.0277	117.268	129.136	141.579	3.06689	481.136	346.312	19.9396	126.468
2-4392-wb8d	4392	2-4392	4392	black	male	60.99	S	Area	6139.17	362.997	461.512	175.697	7139.38	7139.38	85.9903	5.08443	6.46431	2.46096	100	1.70854	286.6	19.9191	20.2446	6.27112	51.0865	9.65109	5.07582	5.16506	113.361	0.410057	5.55333	82.5567	2.42071	15.976	3.44778	2.57252	2.39751	0.26122	322.133	17.8161	14.56	169.04	46.3802	64.4006	2.10828	338.061	367.966	29.9315	0.434217
4-4394-wb8d	4394	4-4394	4394	black	male	54.9	less60	Area	5832.11	788.327	2010.49	120.508	8751.44	8751.44	66.6418	9.00797	22.9733	1.37701	100	2.25843	60.1892	37.9664	38.3998	19.3796	36.9751	57.073	4.50665	37.3023	25.89	1.94865	0.427309	23.0172	0.914664	10.5797	2.65859	3.49045	2.25599	1.05083	1880.45	55.9847	10.5882	540.874	23.114	44.4179	1.44866	106.03	437.003	37.8163	1.04226
A-17-7-wb8d	out_study	A-17/7		black				Area	5014.06	435.755	1427.47	254.467	7131.75	7131.75	70.3062	6.11007	20.0157	3.56809	100	30.9089	393.526	66.8803	66.7584	9.57873	67.3257	35.5591	21.2542	19.7574	4.54675	11.5314	13.3371	176.735	0.704499	5.21427	4.89631	12.113	3.44596	0.387984	1263.68	24.2594	13.2961	223.413	168.19	183.683	2.25414	630.307	352.459	6.73509	61.1345
[truncated: 71 more columns]

## Sheet: jmp_orig_doubl
Compound Method	crotal	id	number	genetictype	gender	%lean	clasif	Name	sum_lipolysis	sum_proteolysis	sum_microbial	sum_unknown	sum total	sum total verif	perc_lipolysis	perc_proteolysis	perc_microbial	perc_unknown	perc total	Methanethiol	Pentane	Propanal	Acetone	Carbon disulfide	n-Hexane	Acetic acid ethenyl ester	2-Butanone	Ethyl Acetate	1-Propanol, 2-methyl-	Butanal, 3-methyl-	Butanal, 2-methyl-	Heptane	Acetic acid	Furan, 2-ethyl-	1-Butanol	2-Pentanone	Pentanal	2,3-Pentanedione	Acetoin	3-Buten-1-ol, 3-methyl-	Toluene	1-Butanol, 3-methyl-	1-Octene	Cyclopropane, pentyl-	3-Hydroxy-3-methyl-2-butanone	Octane	1-Pentanol	Hexanal	2,3-Butanediol
																				proteolysis	lipolysis	lipolysis	lipolysis	proteolysis	lipolysis	microbial	lipolysis	Microbial	microbial	proteolysis	proteolysis	lipolysis	microbial	lipolysis	lipolysis	lipolysis	lipolysis	proteolysis	microbial	proteolysis	unknown	proteolysis	lipolysis	unknown	unknown	lipolysis	lipolysis	lipolysis	microbial
2 negro-wb8d	999	2-NEGRO	999	black				Area	5403.63	374.504	1800.56	110.066	7688.76	7688.76	70.2796	4.87079	23.4181	1.43152	100	0.255571	74.8521	27.8253	28.0402	19.3159	39.8236	65.741	26.1075	45.5023	36.0408	1.22543	1.63615	22.6775	2.39652	8.73629	7.73923	1.26452	2.56414	1.20984	1642.44	3.9698	5.2384	260.975	25.7245	45.3433	1.2818	94.1972	494.799	48.9115	0.385657
5-4302-wb8d	4302	5_4302	4302	black	male	55.27	less60	Area	3560.03	159.54	7421.62	56.5197	11197.7	11197.7	31.7925	1.42475	66.278	0.504743	100	0.422904	46.5811	73.5881	73.7078	12.2196	24.9331	270.459	3.76824	795.773	10.6508	11.7187	0.631952	10.8731	12.8319	8.03589	6.20113	1.55842	2.47897	2.56223	6276.55	0.987648	11.7408	21.8476	17.8221	1.2338	0.635803	62.3383	320.461	170.389	27.2212
7-31-7-17	4306	7-31/7/17	4306	white	male	56.63	less60	Area	3133.43	44.5403	13.9872	133.714	3325.67	3325.67	94.2195	1.33929	0.420584	4.02066	100	0.396343	24.716	47.1672	33.3675	11.5604	48.729		1.11759	3.83615	1.09574	1.26546	1.26546	3.95476	1.16265	0.71649	2.95653	0.497877	148.021	6.19443	2.33859	0.346027	2.85352	0.316841	0.955882	6.56941	0.015568	17.822	175.527	2311.51
5-31-7-17-wb8d	4315	5-31/7/17	4315	white	male	55.53	less60	Area	4785.07	121.57	1160.02	82.4852	6149.14	6149.14	77.8168	1.97702	18.8648	1.34141	100	0.540132	20.7683	27.7819	17.8813	8.50471	26.51	106.154	2.37805	280.865	3.15729	3.08735	1.59508	5.11332	3.82056	4.43968	6.15288	0.557458	135.303	2.83024	764.959	0.722206	13.4671	0.771878	2.08656	0.725491	0.121932	39.409	344.191	2567.54	0.381468
B-17-7-wb8d	4318	B-17/7	4318	white	female	61.99	S	Area	2678.8	444.321	4627.27	88.4355	7838.84	7838.84	34.1735	5.6682	59.0301	1.12817	100	1.95127	93.3714	143.601	144.548	6.31754	42.7806	139.283	9.15113	78.1175	2.93933	3.56906	2.11401	33.2813	0.883051	9.15937	2.82803	9.25799	1.82807	1.14693	4257.4	1.93096	9.12854	312.551	12.4744	10.6433	8.98482	123.784	275.337	11.1305	121.505
5-4330-wb8d	4330	5-4330	4330	black	male	56.1	less60	Area	5563.41	854.844	411.371	224.618	7054.24	7054.24	78.8661	12.1182	5.83154	3.18415	100	2.40045	276.599	42.729	43.535	9.38296	69.0057	9.71564	12.0849	4.20224	62.3396	8.66853	10.447	135.341	16.3188	20.9552	2.22126	2.18358	3.19501	0.217818	212.814	60.1656	8.34622	542.297	81.9139	126.968	4.26836	564.654	287.051	17.5114	17.4048
4-4331-wb8d	4331	4-4331	4331	white	female	60.7	S	Area	4250.72	138.63	113.645	214.262	4717.26	4717.26	90.11	2.93878	2.40914	4.54209	100	0.34697	17.1154	80.6575	80.8143	11.9751	34.7695	8.48919	1.73795	2.18382	34.7266	34.5115	15.5584	4.41271	1.9857	3.87266	3.66513	0.432735	174.783	6.57168	66.1171	0.472686	6.42404	3.92806	0.839734	0.447123	0.0789268	28.5324	185.284	2520.88
1-4-9-17-wb8d	4340	1-4/9/17	4340	black	male	56.79	less60	Area	3945.99	110.047	47.6126	159.263	4262.92	4262.92	92.5656	2.5815	1.1169	3.73601	100	0.229575	34.1482	152.661	153.093	6.24653	31.6794	1.05095	1.26247	3.82938	21.2052	19.7217	11.3424	6.58069	0.414667	3.66855	6.29366	0.951269	169.095	5.96794	4.08121	0.567039	4.53026	2.01059	0.768701	0.569733	0.0161874	35.6736	293.401	2413.34	16.9971
1-4343-wb8d	4343	1-4343	4343	white	female	63.8	S	Area	4301.25	87.275	12.5082	286.494	4687.53	4687.53	91.7595	1.86185	0.266841	6.11184	100	0.790275	32.2838	80.2988	80.8626	8.77063	32.1881	0.881104	1.52613	4.09094	4.41859	4.31779	2.19081	3.0045	0.0289749	1.79313	1.87117	9.94748	242.136	7.30887	3.0514	0.478375	6.68537	0.583676	8.02865	0.505106	0.107527	27.288	113.191	3101.43
6-31-7-17-wb8d	4350	6-31/7/17	4350	white	male	53.21	less60	Area	4244.91	305.547	2964.3	90.6726	7605.42	7605.42	55.8142	4.01749	38.9761	1.19221	100	14.8227	160.927	89.9559	90.4919	12.3745	51.257	74.5989	20.1662	13.9711	2.80824	0.49753	5.41255	70.3986	4.41873	11.7978	6.19935	14.2698	2.88516	0.732303	2696.45	15.8075	10.2457	149.994	71.4396	4.46013	14.4769	264.161	350.24	21.6946	123.165
8-31-7-17-wb8d	4354	8-31/7/17	4354	black	male	63.27	S	Area	3381.81	667.343	1235.05	137.059	5421.26	5421.26	62.3805	12.3097	22.7816	2.52817	100	1.62928	150.977	119.356	119.779	7.441	63.73	35.8609	7.58872	4.81914	13.7885	0.756893	0.154105	21.8	1.61749	13.0938	2.70196	2.6226	4.12477	0.69474	1144.43	55.1292	4.47431	494.946	32.0421	63.4843	0.946882	77.6673	329.72	32.2431	8.27402
2-419-17-wb8d	4356	2-4/9/17	4356	black	female	61.28	S	Area	5025.06	209.83	271.858	246.086	5752.84	5752.84	87.3493	3.64741	4.72563	4.27765	100	0.153649	32.182	2.58667	20.2126	8.31425	55.3499	18.069	2.08908	3.12344	34.1912	34.7407	32.0775	8.24353	15.0807	10.5928	11.1658	0.878916	16.2191	4.7056	198.898	4.64547	12.7159	49.6788	9.6305	5.53643	0.315476	34.2619	428.949	965.311	0.399005
3-4358-wb8d	4358	3-4358	4358	black	male	57.9	less60	Area	4965.8	298.66	1353.57	55.8117	6673.84	6673.84	74.4068	4.47508	20.2818	0.836276	100	0.284583	57.3921	17.3854	17.6368	18.0744	53.2946	69.7067	13.6047	16.8545	7.94848	4.72601	3.90354	13.2567	3.39308	8.71543	10.9371	0.76243	4.27741	1.48768	1242.33	3.72848	4.06472	184.736	17.2007	1.84699	0.528068	51.645	491.583	57.9964	1.90979
4-31-7-17-wb8d	4360	4-31/7/17	4360	black	male	53.78	less60	Area	4039.69	381.778	428.329	119.233	4969.03	4969.03	81.2974	7.68315	8.61996	2.39952	100	0.288576	38.8114	46.8128	29.9299	10.7798	36.2819	20.6869	2.34296	30.0911	140.001	156.08	67.819	8.54889	1.71258	7.16754	5.4521	0.838977	129.297	7.10316	213.726	0.7528	14.1165	21.6899	14.7953	16.855	0.1905	50.1798	280.306	2354.4	15.7305
7-4364-wb8d	4364	7-4364	4364	black	male	58.1	less60	Area	4709.41	520.061	631.647	135.797	5996.92	5996.92	78.5306	8.67214	10.5329	2.26444	100	3.08549	264.424	52.8436	53.8451	7.95347	60.9697	16.698	30.9786	9.51295	30.7786	0.870015	4.95897	64.5045	1.29205	8.98324	1.65585	4.47151	2.48917	0.351183	513.083	36.8604	4.75262	335.795	32.314	67.4288	0.852267	223.44	315.054	16.6695	20.8832
4-4371-c8d	4371	4_4371	4371	black	male	60.1	S	Area	4180.45	91.3475	12.64	307.391	4591.82	4591.82	91.0411	1.98935	0.275273	6.6943	100	0.568448	10.4586	81.9473	14.1678	13.4369	32.3082	0.636314	1.3934	1.05282	0.80174	0.984175	0.984175	2.54822	2.39785	1.53284	2.01621	0.475216	222.78	7.62121	0.580198	0.489652	11.8852	0.5829	7.44445	7.89942	0.033692	24.0914	129.535	2908.1	0.161533
4-4371-WB8D	4371	4_4371	4371	black	male	60.1	S	Area	4407.29	101.802	12.3695	326.29	4847.75	4847.75	90.9141	2.09999	0.255161	6.73076	100	0.348925	24.6974	50.208	19.9343	10.327	27.8345	0.4306	0.853629	0.524271	1.76995	1.22954	1.22954	2.55865	1.76451	8.84779	2.51602	0.537218	223.853	6.9844	0.392443	0.504658	6.0552	0.688965	1.41924	0.408054	0.0835669	22.3322	203.489	3197.44
C8d-C17-7	4372	C-17/7	4372	white	female	63.8	S	Area	3965.5	69.6292	12.2314	224.424	4271.79	4271.79	92.8301	1.62998	0.286331	5.25362	100	0.921091	4.20267	27.8834	16.2189	24.7369	358.599	1.32928	0.769081	1.44984	5.55826	1.74624	2.33567	1.01788	3.22004	0.364914	1.65971	6.99182	180.789	5.78625	0.566397	2.94157	5.05893	0.277388	0.436737	2.86695	0.0551601	6.97117	96.6257	2727.64
6-wb8d-B	4373	6	4373	black	male	57.19	less60	Area	5711.99	138.18	5.00919	139.149	5994.33	5994.33	95.2899	2.30517	0.0835654	2.32135	100	0.260729	15.4132	38.0703	13.8461	6.50208	24.0677	1.99187	1.27283	0.355828	0.0791926	0.698039	0.802474	5.15265	0.3895	10.2333	7.59604	0.74051	54.5599	4.44055	1.95141	0.605278	6.60184	0.572627	12.1475	11.99	0.166161	41.5221	394.653	2447.42
9-31-7-17-wb8d	4387	9-31/7/17	4387	black	female	58.18	less60	Area	4152.24	603.1	467.857	70.0377	5293.23	5293.23	78.4443	11.3938	8.83878	1.32316	100	2.8125	152.475	129.333	130.065	9.02686	66.5768	12.1942	20.2311	6.51367	5.62621	1.80187	3.3331	43.0685	1.62613	12.9841	10.1913	12.0336	6.9738	0.322761	332.877	44.3359	5.22698	443.059	31.5201	18.5174	1.09555	147.187	496.995	16.366	60.5516
1-4388-wb8d	4388	1-4388	4388	white	female	63.8	S	Area	5916.07	1111.56	412.898	124.667	7565.19	7565.19	78.2012	14.6931	5.45787	1.64791	100	1.25631	303.003	58.6902	59.604	4.91481	55.8968	9.85633	5.46421	18.5145	41.4272	5.85044	6.01936	71.9632	16.5255	23.2559	3.13108	2.16704	2.3226	0.249455	254.963	82.0484	21.0887	734.309	102.335	7.90458	4.17974	361.444	331.693	21.0884	2.38467
3-4389-wb8d	4389	3_4389	4389	black	male	46.51	less60	Area	4412.88	359.829	3205.83	236.293	8214.83	8214.83	53.7185	4.38024	39.0249	2.87643	100	17.2866	182.108	74.0783	73.9761	6.14192	60.8273	81.3577	21.5206	31.5762	2.47039	0.826962	9.22093	119.749	1.52567	8.04439	4.2216	12.3715	2.06865	0.739295	2920.75	12.4643	18.0277	117.268	129.136	141.579	3.06689	481.136	346.312	19.9396	126.468
2-4392-wb8d	4392	2-4392	4392	black	male	60.99	S	Area	6139.17	362.997	461.512	175.697	7139.38	7139.38	85.9903	5.08443	6.46431	2.46096	100	1.70854	286.6	19.9191	20.2446	6.27112	51.0865	9.65109	5.07582	5.16506	113.361	0.410057	5.55333	82.5567	2.42071	15.976	3.44778	2.57252	2.39751	0.26122	322.133	17.8161	14.56	169.04	46.3802	64.4006	2.10828	338.061	367.966	29.9315	0.434217
4-4394-wb8d	4394	4-4394	4394	black	male	54.9	less60	Area	5832.11	788.327	2010.49	120.508	8751.44	8751.44	66.6418	9.00797	22.9733	1.37701	100	2.25843	60.1892	37.9664	38.3998	19.3796	36.9751	57.073	4.50665	37.3023	25.89	1.94865	0.427309	23.0172	0.914664	10.5797	2.65859	3.49045	2.25599	1.05083	1880.45	55.9847	10.5882	540.874	23.114	44.4179	1.44866	106.03	437.003	37.8163	1.04226
A-17-7-wb8d	out_study	A-17/7		black				Area	5014.06	435.755	1427.47	254.467	7131.75	7131.75	70.3062	6.11007	20.0157	3.56809	100	30.9089	393.526	66.8803	66.7584	9.57873	67.3257	35.5591	21.2542	19.7574	4.54675	11.5314	13.3371	176.735	0.704499	5.21427	4.89631	12.113	3.44596	0.387984	1263.68	24.2594	13.2961	223.413	168.19	183.683	2.25414	630.307	352.459	6.73509	61.1345
[truncated: 71 more columns]

## Sheet: jmp-family
Compound Method	crotal	id	number	genetictype	gender	%lean	clasif	Name	(1) Hydrocarbons	(1.1) Aliphatic Hydrocarbons	(1.2)Aromatic and cyclic hycrocarbons	Aldehyde	ketone	Carboxilic acid	Esther and ether	Alcohol	Furans	Sulphur compounds	TOTAL_fam	Perc_(1.1) Aliphatic Hydrocarbons	Perc_(1.2)Aromatic and cyclic hycrocarbons	Perc_Aldehyde	Perc_ketone	Perc_Carboxilic acid	Perc_Esther and ether	Perc_Alcohol	Perc_Furans	Perc_Sulphur compounds	suma_perc	crotal	C10:0	C12:0	C14:0	C16:0	c9-C16:1	C17:0	c9-C17:1	C18:0	c9-C18:1	c11-C18:1	c9,12-C18:2	C18:3 n6	C18:3 n3	C20:0	c11-C20:1	C20:2	C20:3 n6	C20:4	C20:3 n3
2 negro-wb8d	999	2-NEGRO	999	black				Area	723.092	670.22	52.8719	315.027	97.1796	1664.98	118.198	4657.68	93.0357	19.5714	7688.76	8.71688	0.687652	4.09724	1.26392	21.6547	1.53728	60.5777	1.21002	0.254546	100	999	0	0	1.56119	22.8892	3.02097	0.274659	0.279015	10.9992	39.4033	3.09056	14.5762	0.0894415	1.22479	0.116284	0.555536	0.496991	0.151246	1.06826	0.146455
5-4302-wb8d	4302	5_4302	4302	black	male	55.27	less60	Area	467.181	461.928	5.25331	348.727	119.162	6316.11	1069.04	2779.45	85.4013	12.6425	11197.7	4.1252	0.0469142	3.11427	1.06416	56.4054	9.54691	24.8216	0.762667	0.112902	100	4302	0.226184	0.118641	1.52333	24.6013	4.27987	0.118357	0.129458	11.0738	44.6759	4.31183	6.18674	0	0.402212	0.109369	0.686073	0.25981	0.158606	1.07054	0.0680839
7-31-7-17	4306	7-31/7/17	4306	white	male	56.63	less60	Area	279.488	271.84	7.64764	2597.72	49.1729	32.8312	18.134	322.714	13.6503	11.9567	3325.67	8.17399	0.229958	78.1113	1.47859	0.987207	0.545274	9.70372	0.410454	0.359528	100	4306	0.157351	0.166658	1.24021	21.4374	1.91103	0.256581	0.218172	12.2194	38.5999	2.39701	17.0627	0.0793653	1.55921	0.148587	0.635824	0.66471	0.153114	0.839897	0.195481
5-31-7-17-wb8d	4315	5-31/7/17	4315	white	male	55.53	less60	Area	321.893	318.831	3.06231	2931.78	57.6154	799.815	412.001	1531.42	85.5753	9.04485	6149.14	5.18496	0.0498006	47.6778	0.936966	13.0069	6.70014	24.9046	1.39166	0.147091	100	4315	0	0.105503	1.43183	22.5973	2.75877	0.220644	0.212336	11.7479	40.0115	2.88463	14.1872	0.0924258	1.18398	0.113014	0.607483	0.447882	0.147072	1.08358	0.166917
B-17-7-wb8d	4318	B-17/7	4318	white	female	61.99	S	Area	512.968	492.733	20.2346	224	238.602	4299.08	219.641	2231.53	104.748	8.26881	7838.84	6.28579	0.258132	2.85756	3.04384	54.8433	2.80196	28.4676	1.33628	0.105485	100	4318	0	0.142396	1.74013	23.9805	4.20336	0.314302	0.279176	10.8183	36.3213	3.64835	14.5972	0.127314	1.04924	0	0.489958	0.333456	0.277043	1.67794	0
5-4330-wb8d	4330	5-4330	4330	black	male	56.1	less60	Area	1684.17	1554.79	129.374	190.496	143.346	272.89	20.037	4489.35	242.177	11.7834	7054.24	22.0405	1.83398	2.70044	2.03205	3.86846	0.284042	63.6404	3.43307	0.16704	100	4330	0	0.0945866	1.40208	21.3787	2.8576	0.626783	0.512488	10.3152	36.2169	3.25395	18.3807	0.192854	1.2873	0.110134	0.527832	0.435292	0.340084	1.92212	0.145418
4-4331-wb8d	4331	4-4331	4331	white	female	60.7	S	Area	378.756	371.56	7.19632	2958.18	109.445	90.6377	27.2116	1088.01	52.6938	12.3221	4717.26	7.87661	0.152553	62.7097	2.32011	1.92141	0.576852	23.0645	1.11704	0.261212	100	4331	0	0.107401	1.3426	21.5024	2.2139	0.387225	0.311618	12.7507	36.3344	2.36625	18.1604	0.13783	1.45369	0	0.505832	0.536625	0.303849	1.39679	0.188492
1-4-9-17-wb8d	4340	1-4/9/17	4340	black	male	56.79	less60	Area	322.177	319.099	3.07724	2953.24	182.314	36.5687	8.16763	698.429	55.544	6.4761	4262.92	7.48547	0.0721862	69.2775	4.27674	0.857834	0.191597	16.3838	1.30296	0.151917	100	4340	0	0.0962262	1.50159	23.2418	2.43034	0.45854	0.315327	12.1324	38.5989	2.6464	14.7849	0.115202	1.15998	0.115794	0.633528	0.477336	0.169515	0.970553	0.151624
1-4343-wb8d	4343	1-4343	4343	white	female	63.8	S	Area	464.02	443.516	20.5039	3578.89	117.986	11.3376	27.1417	429.988	48.6054	9.56091	4687.53	9.46161	0.437414	76.3492	2.51702	0.241867	0.579019	9.17302	1.03691	0.203965	100	4343	0.171264	0.101728	1.27892	20.7956	2.36224	0.407817	0.371202	11.2012	37.6838	2.87147	18.1935	0.123582	1.43999	0.0929012	0.429875	0.576638	0.21779	1.45164	0.148123
6-31-7-17-wb8d	4350	6-31/7/17	4350	white	male	53.21	less60	Area	923.526	917.049	6.47641	207.727	214.693	2754.14	91.8726	3290.26	96.0078	27.1972	7605.42	12.0578	0.0851551	2.7313	2.8229	36.2129	1.20799	43.262	1.26236	0.357603	100	4350	0.150182	0.104572	1.31385	21.3323	2.22118	0.252568	0.194623	11.9227	33.4867	3.00551	19.811	0.109152	1.41089	0.130782	0.681803	0.75591	0.41497	2.44742	0.224853
8-31-7-17-wb8d	4354	8-31/7/17	4354	black	male	63.27	S	Area	673.044	607.54	65.504	242.799	179.963	1169.31	74.1694	2955.93	116.98	9.07028	5421.26	11.2066	1.20828	4.47865	3.31958	21.569	1.36812	54.5247	2.15779	0.167309	100	4354	0.166249	0.124037	1.64852	23.0462	2.93702	0.478291	0.444384	10.2077	36.9595	3.05582	16.8568	0.0854244	1.44151	0.109589	0.540509	0.54249	0.155274	0.924023	0.16195
2-419-17-wb8d	4356	2-4/9/17	4356	black	female	61.28	S	Area	635.417	626.612	8.80543	1204.2	58.5591	268.914	45.3326	3453.86	78.088	8.4679	5752.84	10.8922	0.153062	20.9322	1.01792	4.67445	0.788004	60.0375	1.35738	0.147195	100	4356	0	0.0978741	1.35016	22.2343	2.11557	0.497428	0.37174	11.84	35.3073	2.43461	19.3598	0.131571	1.55557	0.126938	0.569778	0.572754	0.15584	1.08032	0.198398
3-4358-wb8d	4358	3-4358	4358	black	male	57.9	less60	Area	600.479	593.926	6.55301	305.711	68.4856	1262.48	98.6023	4232.7	87.0232	18.359	6673.84	8.89932	0.0981895	4.58074	1.02618	18.9169	1.47744	63.4222	1.30395	0.275088	100	4358	0.227351	0.119721	1.48504	23.3538	4.19229	0.252816	0.256074	10.1367	42.2928	4.37667	9.69963	0	0.666632	0.106072	0.644583	0.339414	0.18374	1.51203	0.0961936
4-31-7-17-wb8d	4360	4-31/7/17	4360	black	male	53.78	less60	Area	331.987	310.92	21.0672	2969.36	78.1433	256.921	87.1354	1134.45	99.9689	11.0684	4969.03	6.25716	0.42397	59.7573	1.57261	5.17044	1.75357	22.8304	2.01184	0.222747	100	4360	0	0.124536	1.70935	24.6216	3.1938	0.26174	0.219971	11.8309	37.3315	3.00215	14.179	0.0912223	1.15309	0.103586	0.533336	0.369282	0.146103	0.985384	0.143392
7-4364-wb8d	4364	7-4364	4364	black	male	58.1	less60	Area	1108.14	1038.35	69.7817	177.34	145.79	530.22	30.4199	3859.37	134.606	11.039	5996.92	17.3148	1.16363	2.95718	2.43108	8.84154	0.507258	64.3558	2.24459	0.184077	100	4364	0	0.11663	1.54298	23.5033	2.82404	0.31234	0.267697	12.5931	39.7798	2.77429	12.6984	0.10781	1.07042	0.113288	0.639437	0.393755	0.154277	0.956355	0.152002
4-4371-c8d	4371	4_4371	4371	black	male	60.1	S	Area	507.99	496.324	11.6652	3371.34	43.8811	33.9995	24.1133	546.729	49.7719	14.0053	4591.82	10.8089	0.254042	73.4204	0.955636	0.740435	0.525135	11.9066	1.08392	0.305005	100	4371	0	0	1.31231	23.3193	3.49609	0.135565	0.140832	10.9412	43.4726	3.85354	9.90001	0.0678061	0.615038	0.129018	0.726258	0.375162	0.195598	1.22071	0.0989769
4-4371-WB8D	4371	4_4371	4371	black	male	60.1	S	Area	465.151	451.795	13.3555	3630.49	51.9178	20.7472	22.5836	572.741	73.4396	10.6759	4847.75	9.31969	0.2755	74.8903	1.07097	0.427976	0.465858	11.8146	1.51492	0.220225	100	4371	0	0	1.31231	23.3193	3.49609	0.135565	0.140832	10.9412	43.4726	3.85354	9.90001	0.0678061	0.615038	0.129018	0.726258	0.375162	0.195598	1.22071	0.0989769
C8d-C17-7	4372	C-17/7	4372	white	female	63.8	S	Area	758.976	746.608	12.3687	3051.22	39.3571	30.7084	19.3868	328.343	18.1377	25.658	4271.79	17.4776	0.289544	71.4272	0.921327	0.718865	0.453834	7.68632	0.424593	0.600638	100	4372	0	0	1.37203	21.8499	2.33043	0.382609	0.285749	13.0603	37.9169	2.93121	15.5359	0.110263	1.22594	0.12109	0.571764	0.557833	0.246632	1.27753	0.15498
6-wb8d-B	4373	6	4373	black	male	57.19	less60	Area	543.106	501.514	41.5926	2752.88	73.4905	19.3223	36.2913	2439.98	122.492	6.76281	5994.33	8.36647	0.693865	45.9248	1.226	0.322344	0.605427	40.7048	2.04347	0.11282	100	4373	0	0.10886	1.39023	21.1382	1.76453	0.310059	0.230135	13.0668	35.55	2.23938	19.5032	0.108805	1.71001	0.151858	0.582981	0.659517	0.180206	1.08785	0.217319
9-31-7-17-wb8d	4387	9-31/7/17	4387	black	female	58.18	less60	Area	723.011	703.007	20.0037	244.896	223.097	354.103	21.6692	3611.25	103.369	11.8394	5293.23	13.2812	0.377911	4.62658	4.21477	6.68972	0.409375	68.2239	1.95285	0.22367	100	4387	0	0.113793	1.59654	23.0044	2.32746	0.501263	0.322071	12.696	34.0705	2.50324	18.5035	0.12296	1.55159	0.115885	0.501585	0.54416	0.185621	1.06912	0.197742
1-4388-wb8d	4388	1-4388	4388	white	female	63.8	S	Area	1472.83	1455.01	17.8179	297.529	165.278	313.065	35.0009	4972.09	303.229	6.17113	7565.19	19.233	0.235524	3.93287	2.18471	4.13823	0.462657	65.7232	4.00821	0.0815726	100	4388	0.256824	0.104379	1.38351	21.5203	2.49393	0.357472	0.293967	12.0104	38.3427	3.35876	15.0935	0.124848	1.02719	0.11558	0.567183	0.565602	0.270011	1.90446	0.133805
3-4389-wb8d	4389	3_4389	4389	black	male	46.51	less60	Area	1502.61	1358.9	143.714	219.917	176.48	2999.53	117.872	3037.42	137.569	23.4285	8214.83	16.542	1.74945	2.67708	2.14831	36.5136	1.43486	36.9748	1.67465	0.285197	100	4389	0.221159	0.133404	1.84843	24.7666	3.5821	0.213456	0.219445	11.4534	40.0184	3.50811	10.8851	0.0553617	0.88228	0.110557	0.584568	0.391335	0.125601	0.807323	0.112433
2-4392-wb8d	4392	2-4392	4392	black	male	60.99	S	Area	1375.8	1307.59	68.2056	308.209	99.2322	362.82	18.7883	4788.12	178.44	7.97967	7139.38	18.3152	0.955344	4.31702	1.38993	5.08195	0.263164	67.0663	2.49937	0.11177	100	4392	0	0.0893384	1.32287	22.1649	2.60331	0.313908	0.253856	11.8698	40.9563	2.82308	13.7514	0.120046	1.07955	0.127102	0.521919	0.36945	0.241351	1.39173	0
4-4394-wb8d	4394	4-4394	4394	black	male	54.9	less60	Area	753.493	707.362	46.1305	336.357	122.852	1898.06	105.095	5336.63	177.311	21.638	8751.44	8.08281	0.527119	3.84345	1.40379	21.6885	1.20089	60.9801	2.02608	0.247251	100	4394	0.267589	0.130922	1.55721	23.1314	3.25258	0.222425	0.19103	12.5917	36.9716	3.48439	13.4848	0	0.956087	0.118666	0.629901	0.539229	0.27146	2.00197	0.145098
A-17-7-wb8d	FORA ESTUDI	A-17/7		black				Area	1871.98	1684.87	187.103	199.688	153.126	1317.64	58.3081	3386.99	103.533	40.4876	7131.75	23.625	2.62352	2.79999	2.1471	18.4757	0.817584	47.4918	1.45172	0.567709	100		0	0.11789	1.50827	23.2932	3.22369	0.157776	0.164203	11.4117	43.0963	3.21863	10.4611	0	0.878867	0.123999	0.703519	0.336653	0.148734	1.00659	0.148755
[truncated: 12 more columns]
